# Supplementary material for: Design, synthesis and biological evaluation of chalcone analogues with novel dual antioxidant mechanisms as potential anti-ischemic stroke agents
Source: PubMed Central journal article supplement — Acta Pharm Sin B. 2019 Jan 7;9(2):335–50. doi: 10.1016/j.apsb.2019.01.003 (PMC6437665; doi:10.1016/j.apsb.2019.01.003), 2019-01-07
Supplement: mmc1.pdf [file mmc1.pdf]

## Supplementary Information for

### ORIGINAL ARTICLE

# Design, synthesis and biological evaluation of chalcone analogues with novel dual antioxidant mechanisms as potential anti-ischemic stroke agents

Jiabing Wang<sup>a,b†</sup>, Lili Huang<sup>a,c†</sup>, Chanchan Cheng<sup>a,†</sup>, Ge Li<sup>a,†</sup>, Jingwen Xie<sup>a</sup>, Mengya Shen<sup>a</sup>, Qian Chen<sup>a</sup>, Wulan Li<sup>a,d</sup>, Wenfei He<sup>a</sup>, Peihong Qiu<sup>a,\*</sup>, Jianzhang Wu<sup>a,\*</sup>

<sup>a</sup>*Chemical Biology Research Center, School of Pharmaceutical Sciences, Wenzhou Medical University, Wenzhou 325035, China*

<sup>b</sup>*Municipal Hospital Affiliated to Medical School of Taizhou University, Taizhou 318000, China*

<sup>c</sup>*Ningbo Medical Centre Lihuili Hospital, Ningbo 315041, China*

<sup>d</sup>*College of Information Science and Computer Engineering, Wenzhou Medical University, Wenzhou 325035, China*

<sup>†</sup>These authors made equal contributions to this work.

Running title: Chalcone analogues with novel dual antioxidant mechanisms as anti-ischemic stroke agents

\*Correspondence authors.

E-mail addresses: wjzwzmc@126.com (Peihong Qiu); [wjzwzmu@163.com](mailto:wjzwzmu@163.com) (Jianzhang Wu).

## Contents

**Figure S1** **1b**'s cytoprotection on PC12 cells in H<sub>2</sub>O<sub>2</sub> damage model Page 2

**Figure S2** The nucleus translocation of NRF2 caused by **33** Page 3

**Figure S3-S43** LC-MS, <sup>1</sup>H NMR and <sup>13</sup>C NMR spectra of compounds and original spectra of all compounds Page 4-44

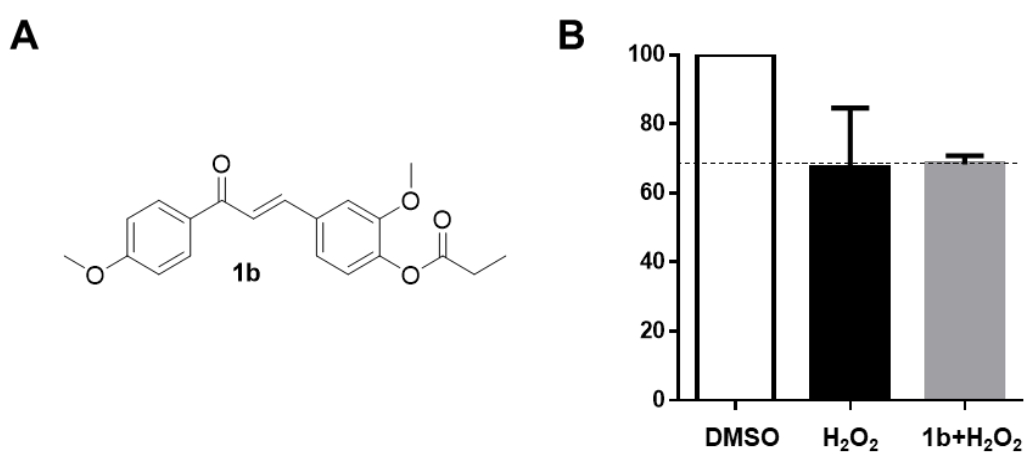

**Figure S1** **1b**'s cytoprotection on PC12 cells in H<sub>2</sub>O<sub>2</sub> damage model. (A) The structure of **1b**. (B) PC12 cells were pretreated for 1h with **1b** (10  $\mu$ mol/L), then another 24 h exposure in H<sub>2</sub>O<sub>2</sub> (450  $\mu$ mol/L), finally determined by the MTT assay. The viability of untreated cells is defined as 100%.

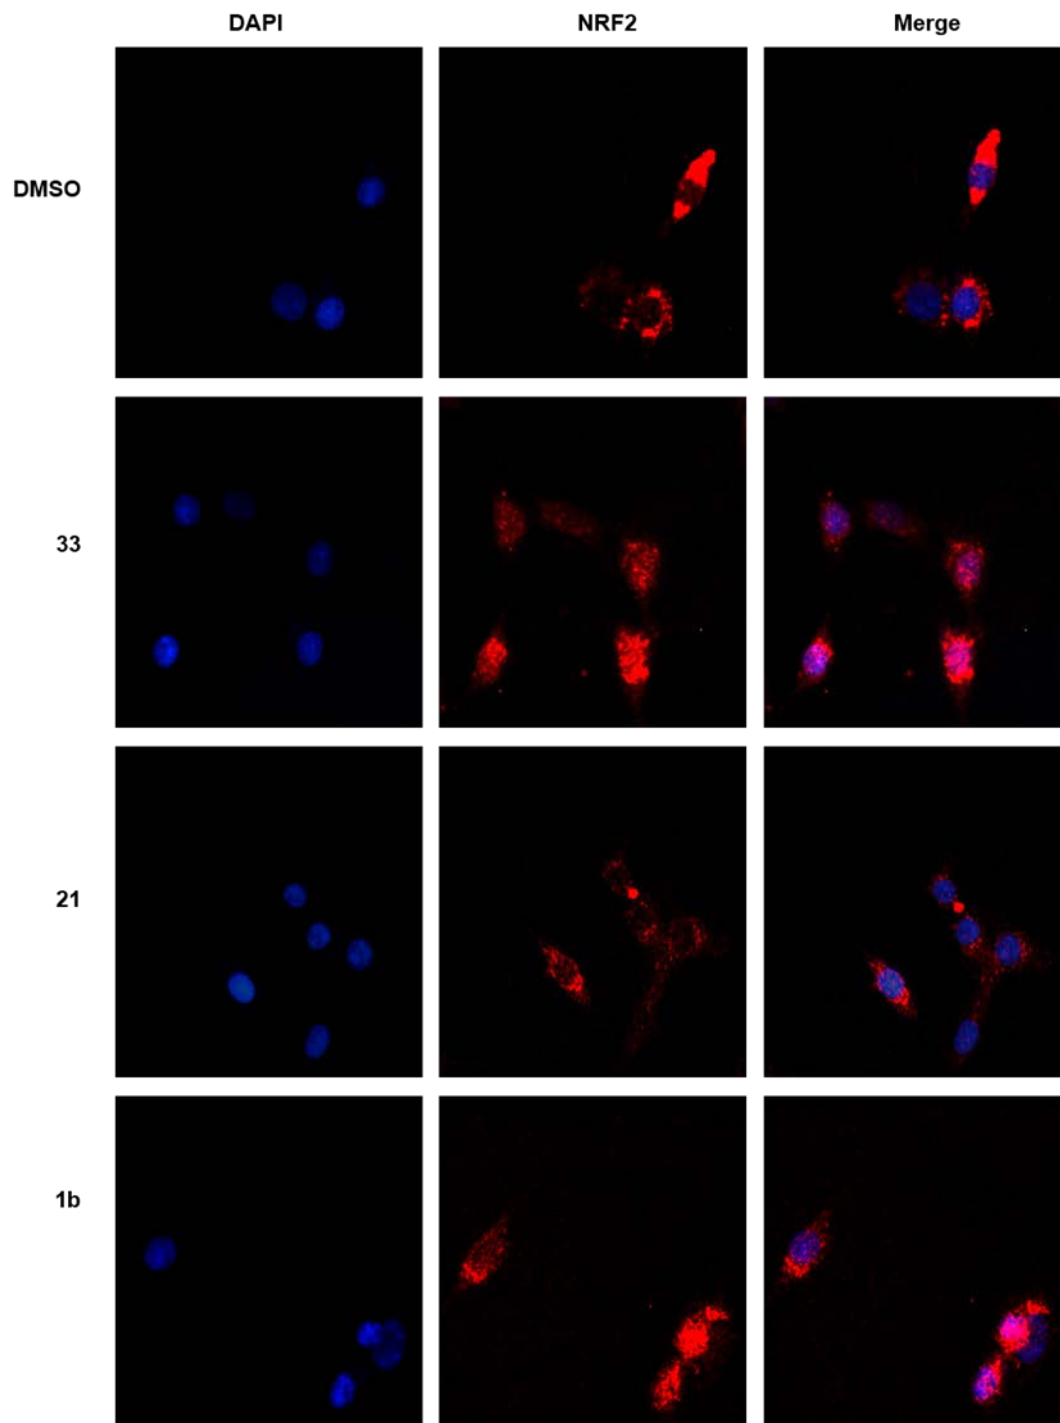

**Figure S2** The nucleus translocation of NRF2 caused by **33**. PC12 cells were incubated with **33**, **21** and **1b** at 10  $\mu\text{mol/L}$  for 6 h, and then stained with NRF2 antibody and DAPI.

LC-MS,  $^1\text{H}$  NMR and  $^{13}\text{C}$  NMR spectra of compounds and original spectra of all compounds

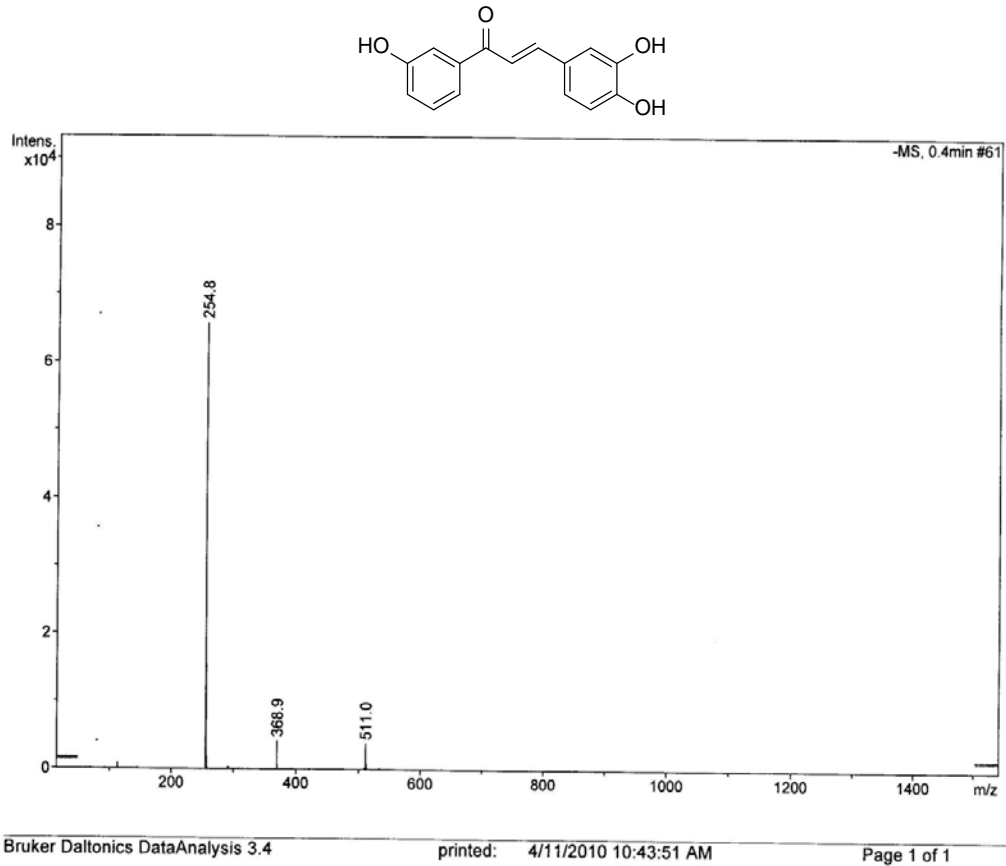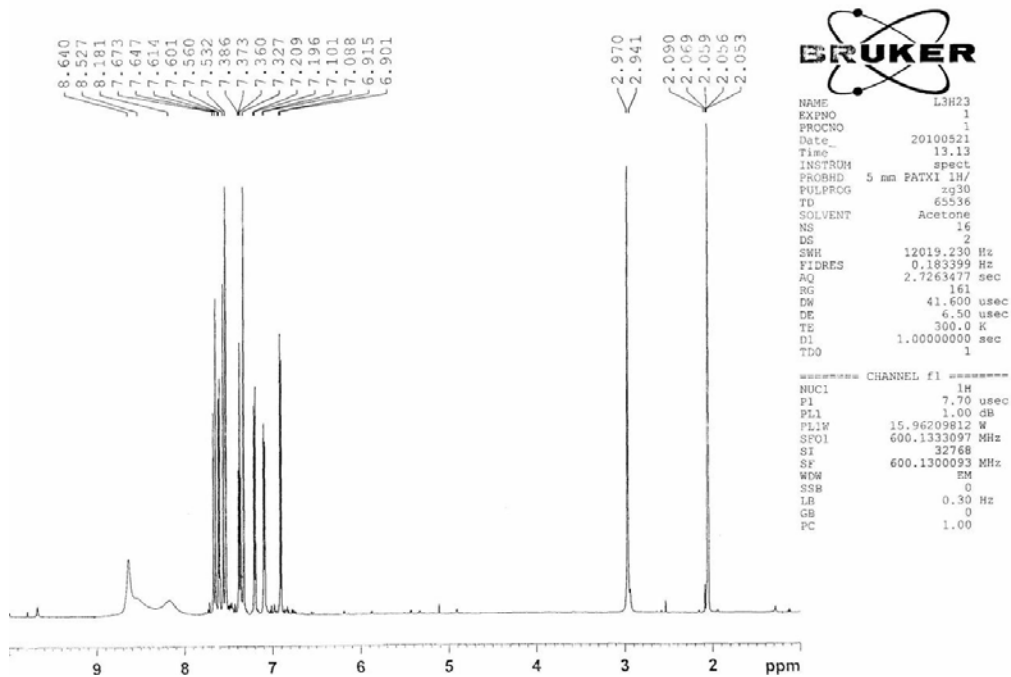

Figure S3 LC-MS and  $^1\text{H}$  NMR spectra of compound 1.

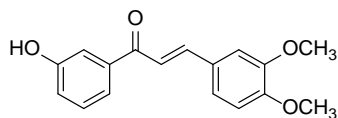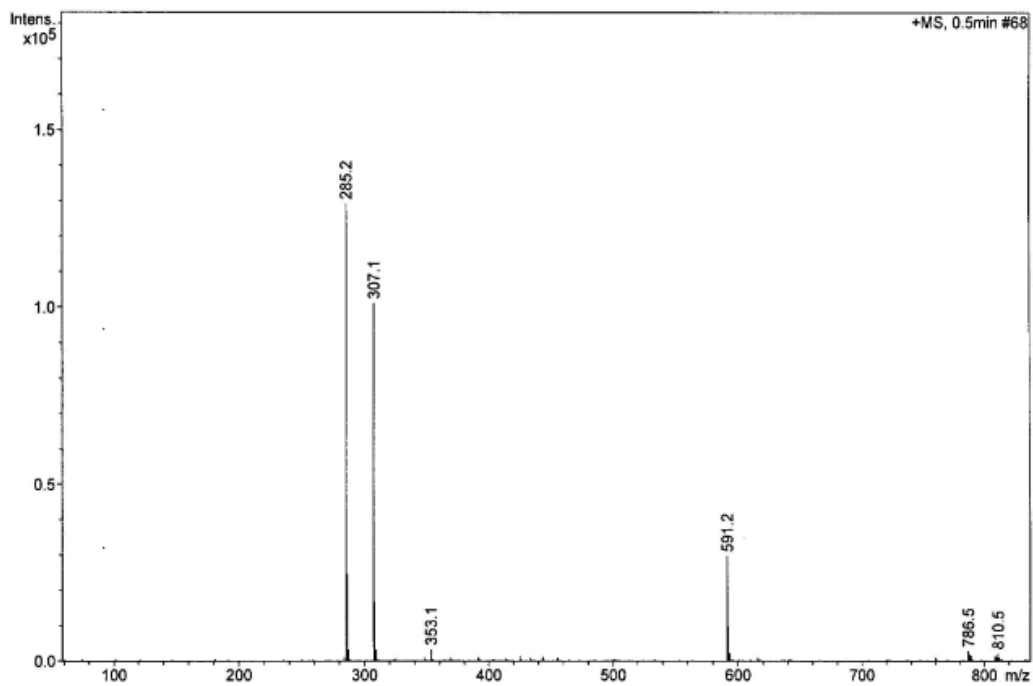

Bruker Daltonics DataAnalysis 3.4

printed: 4/15/2010 7:21:27 PM

Page 1 of 1

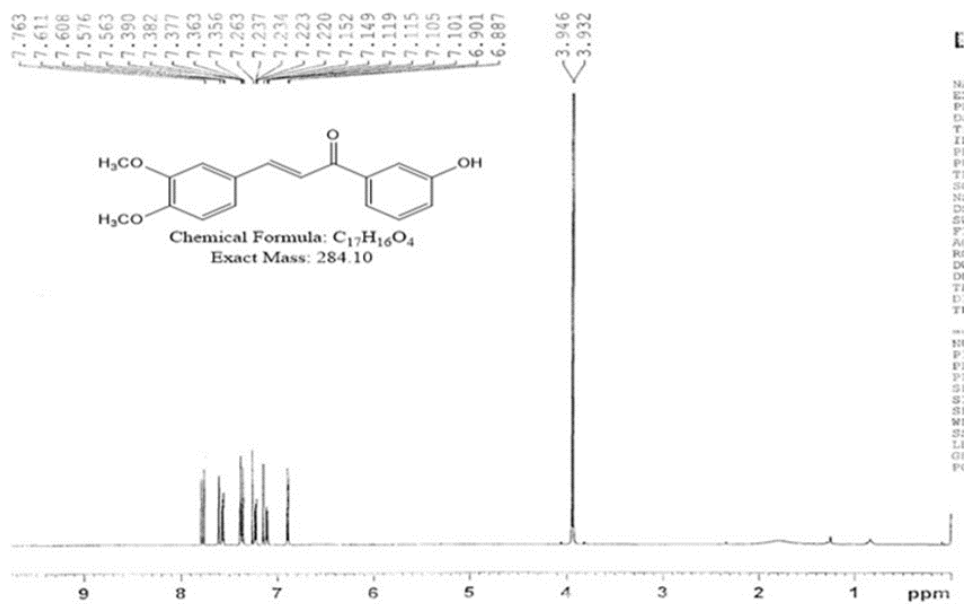

Figure S4 LC-MS and  $^1H$  NMR spectra of compound 2.

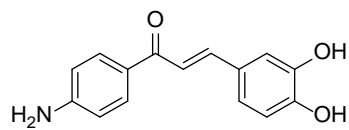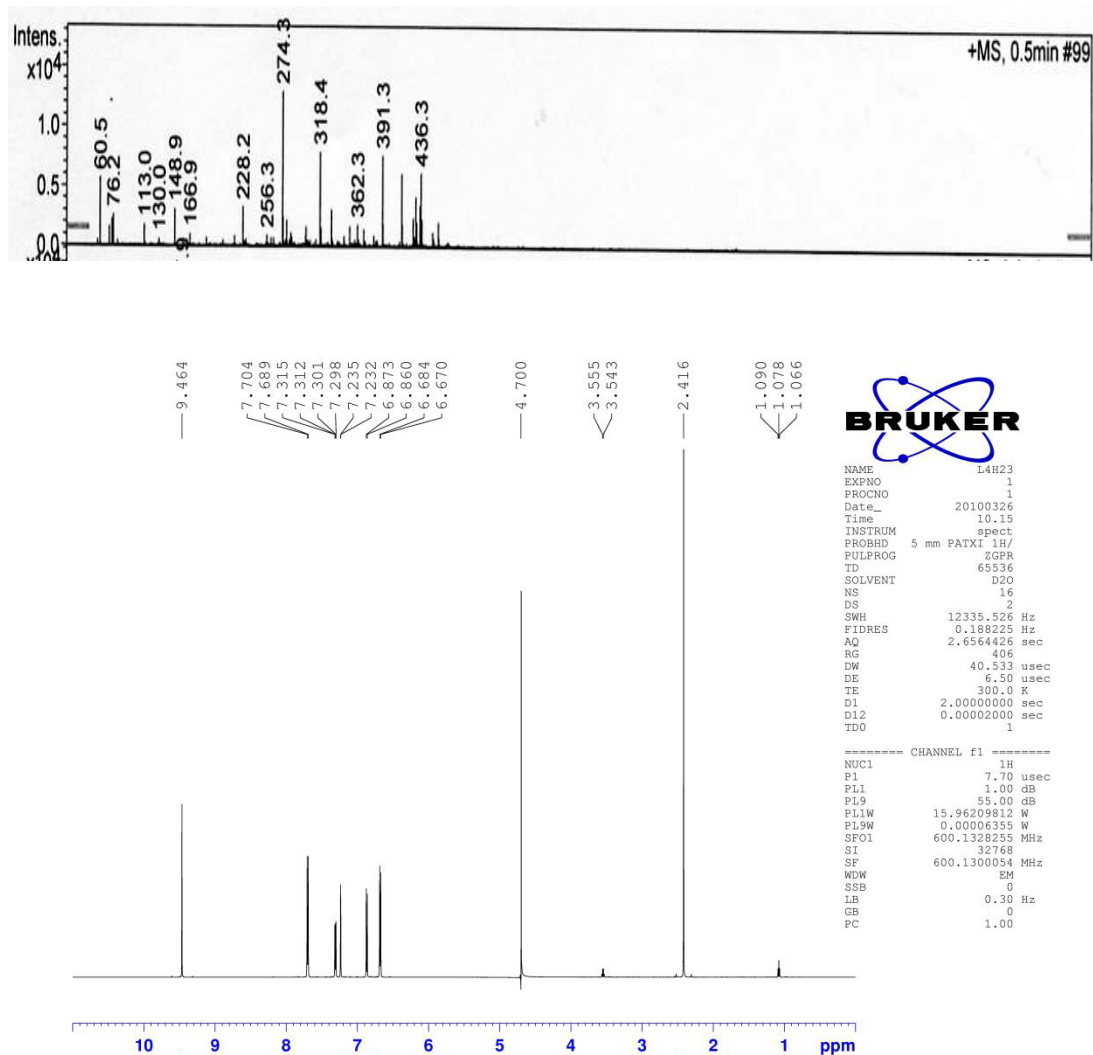

Figure S5 LC-MS and <sup>1</sup>H NMR spectra of compound 3.

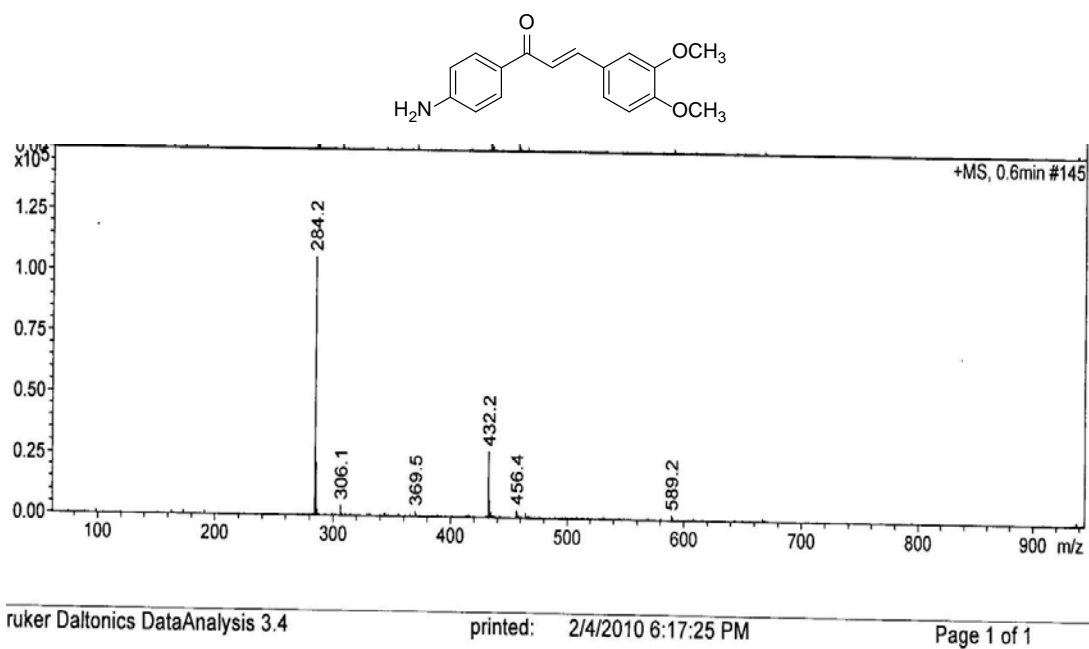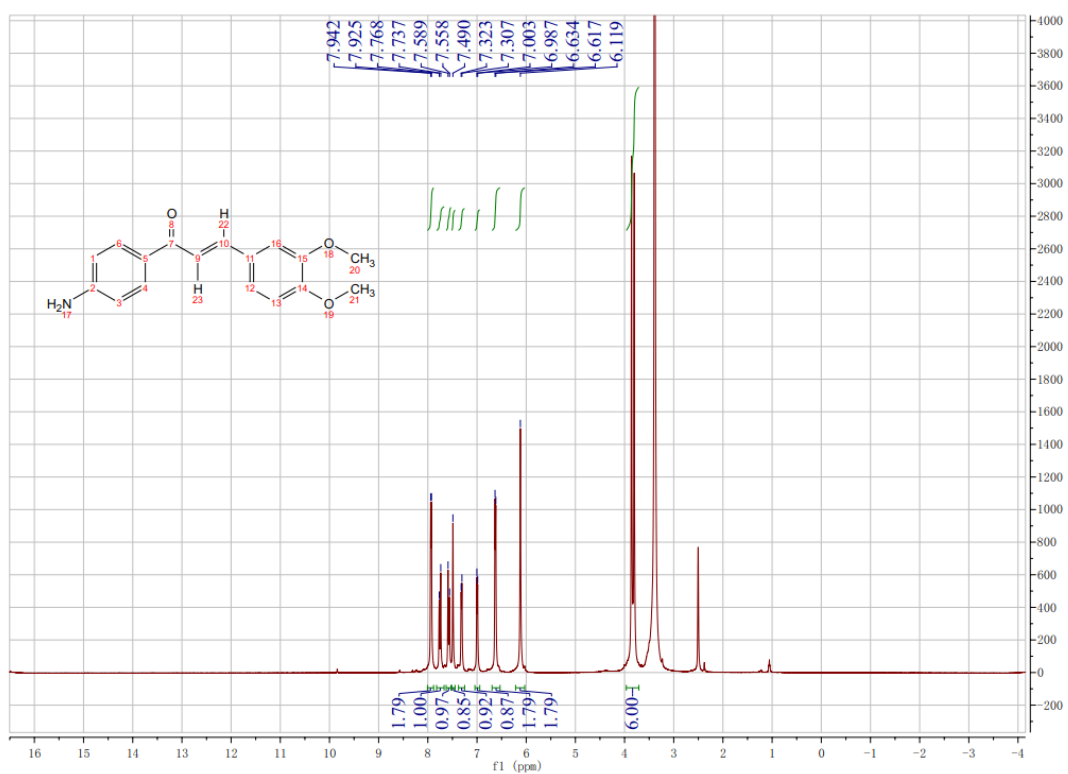

**Figure S6** LC-MS and  $^1\text{H}$  NMR spectra of compound **4**.

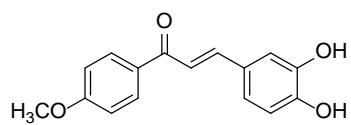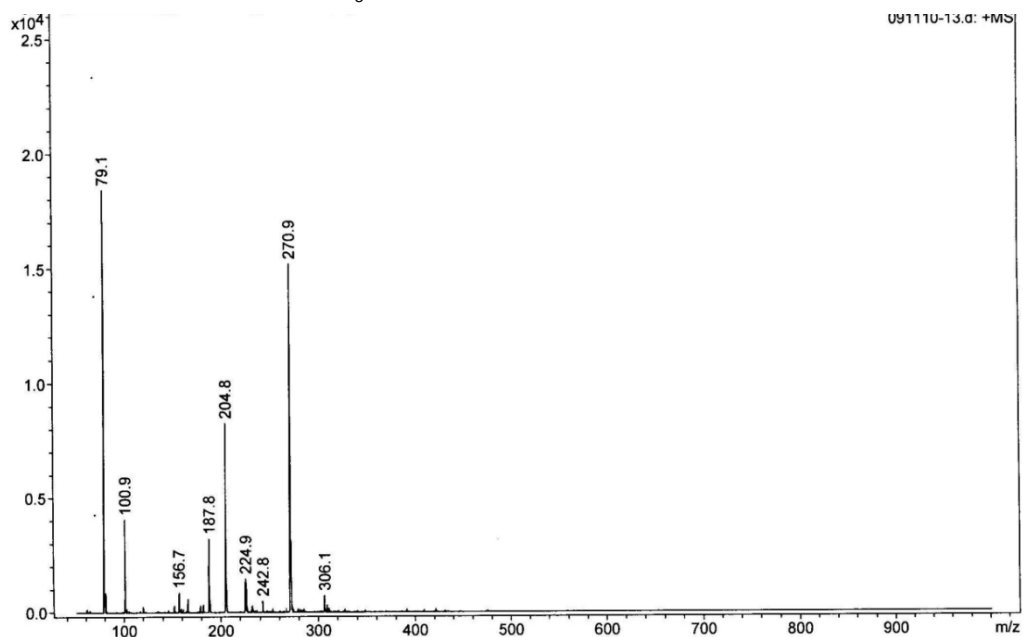

Bruker Daltonics DataAnalysis 3.4

printed: 11/10/2009 11:32:01 AM

Page 1 of 1

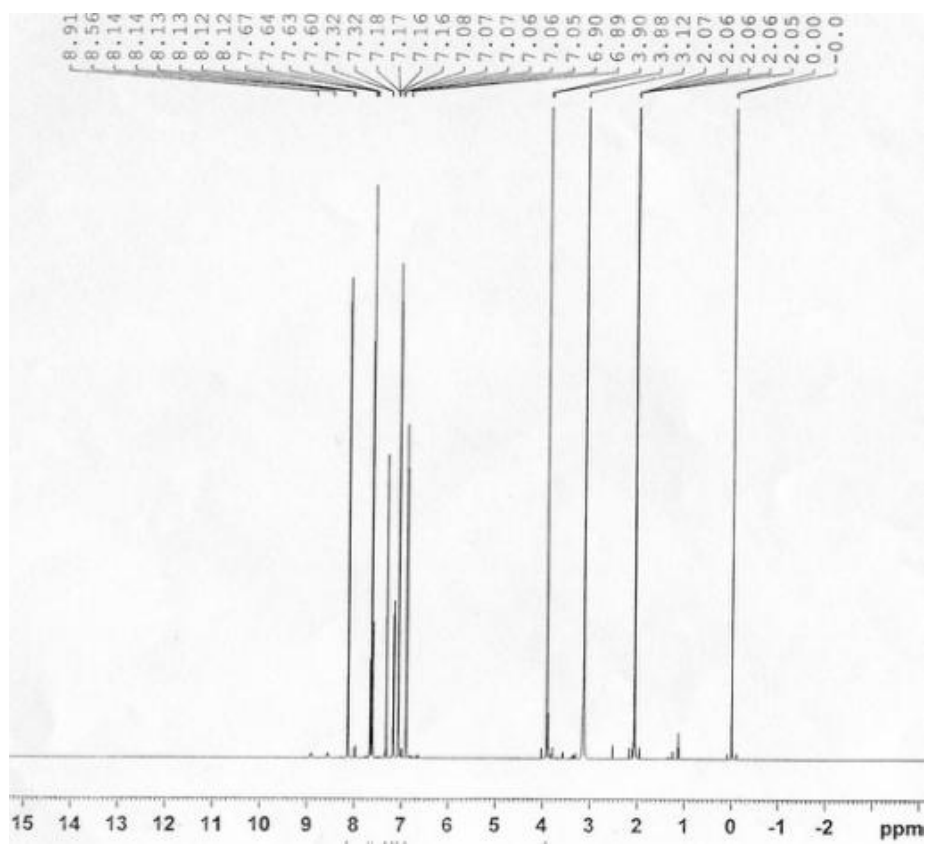

Figure S7 LC-MS and  $^1\text{H}$  NMR spectra of compound 5.



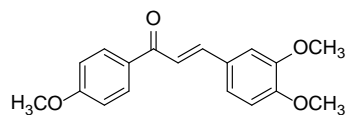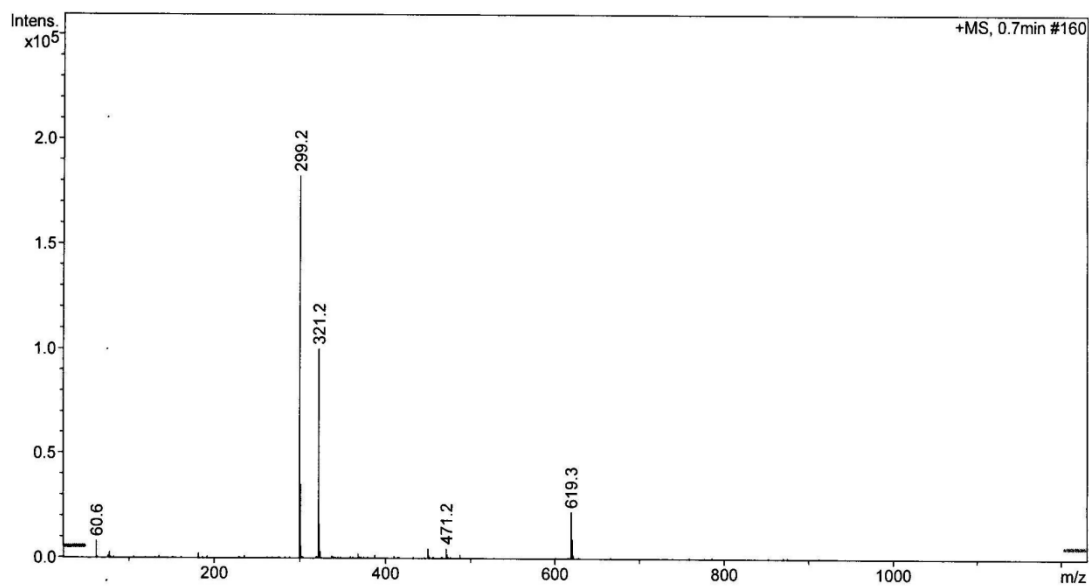

Bruker Daltonics DataAnalysis 3.4

printed: 1/22/2010 10:47:26 AM

Page 1 of 1

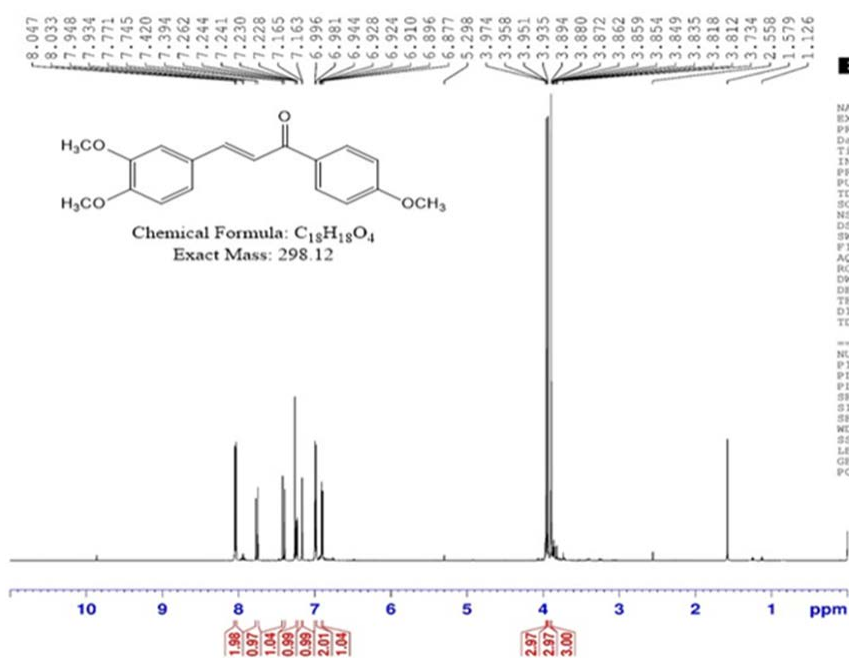

Figure S8 LC-MS and <sup>1</sup>H NMR spectra of compound 6.

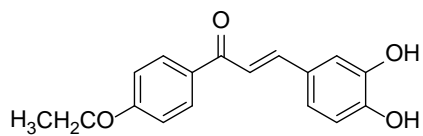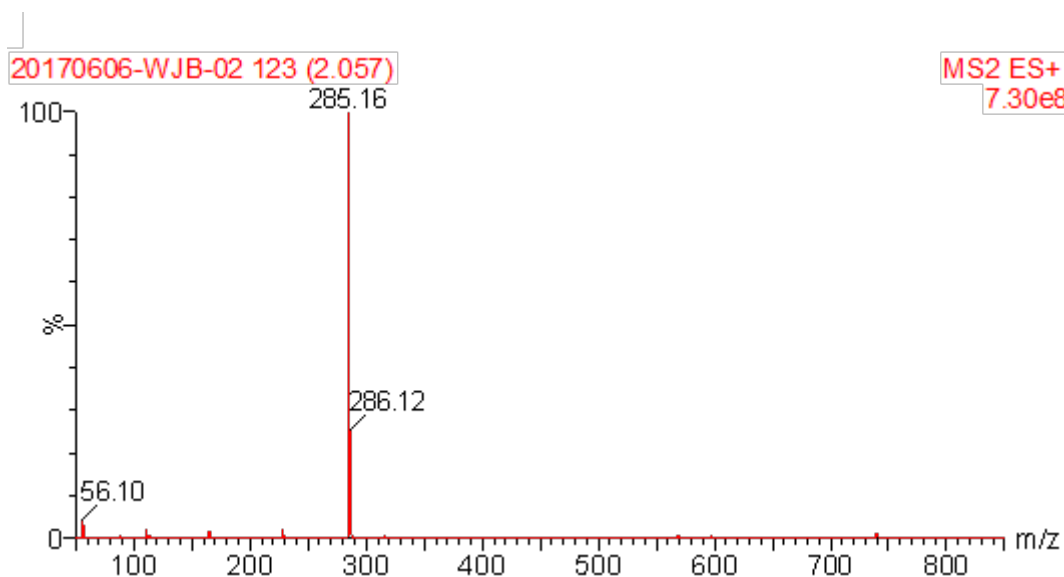

MS2 ES+  
7.30e8

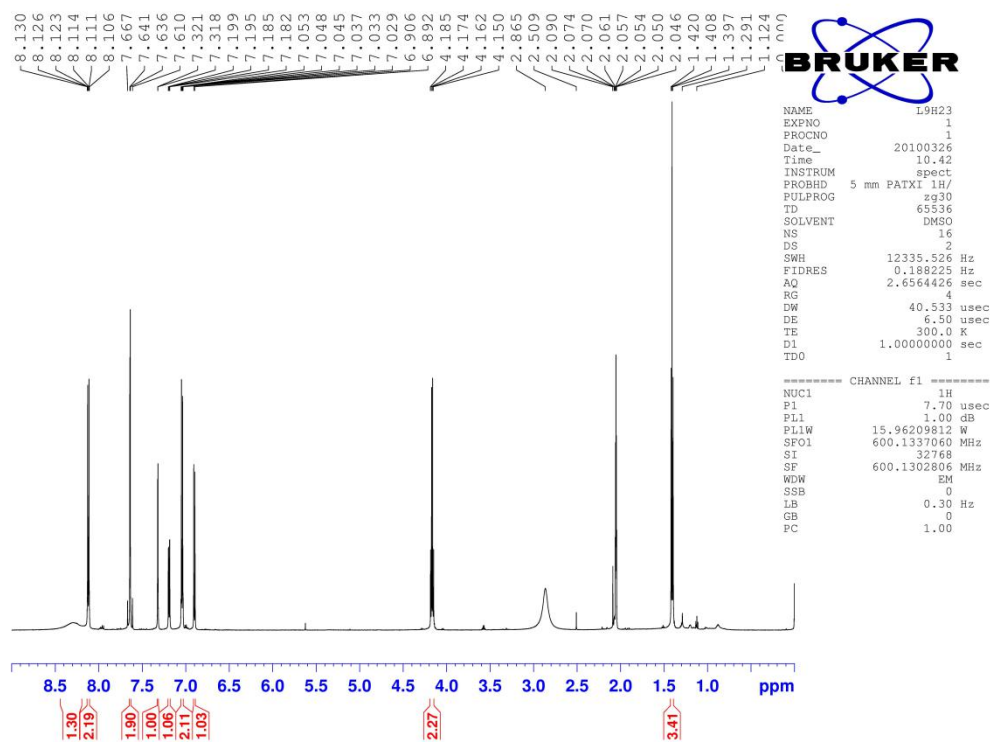

Figure S9 LC-MS and <sup>1</sup>H NMR spectra of compound 7.

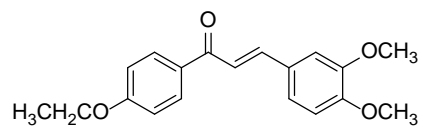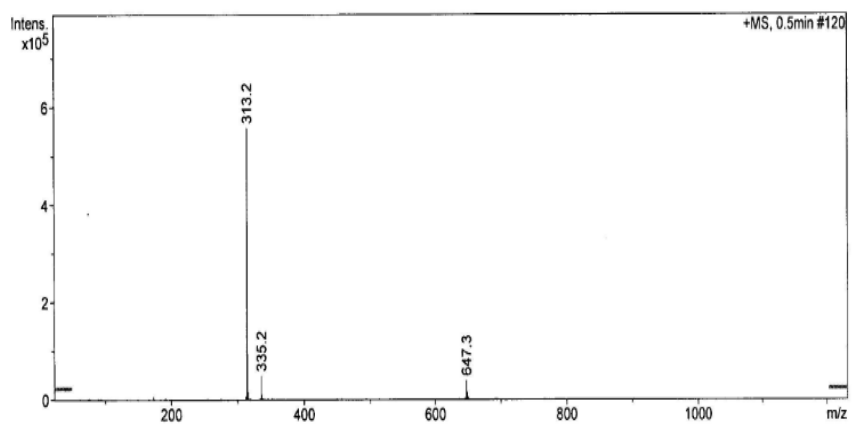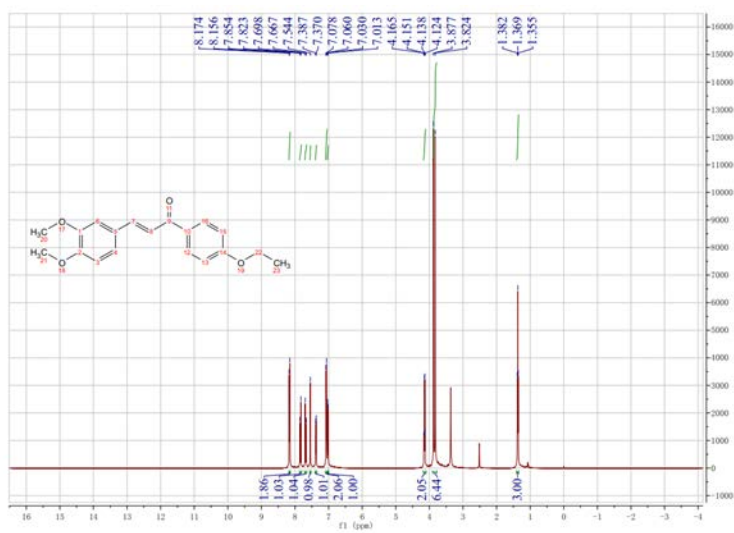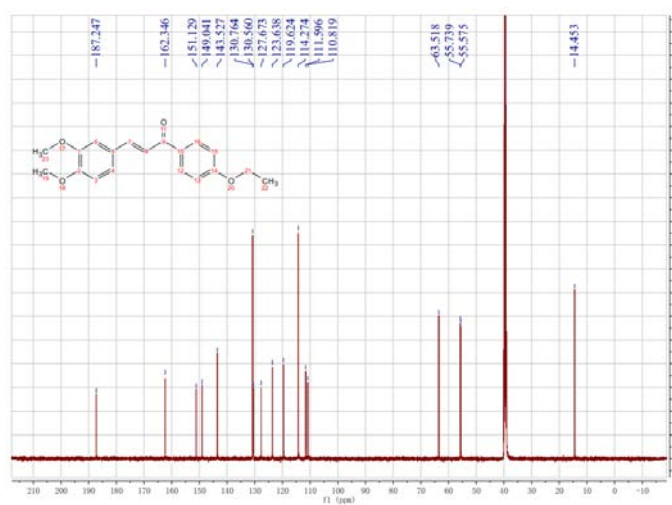

Figure S10 LC-MS, <sup>1</sup>H NMR and <sup>13</sup>C NMR spectra of compound 8.

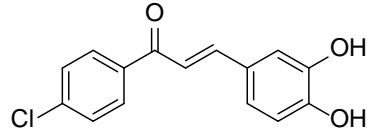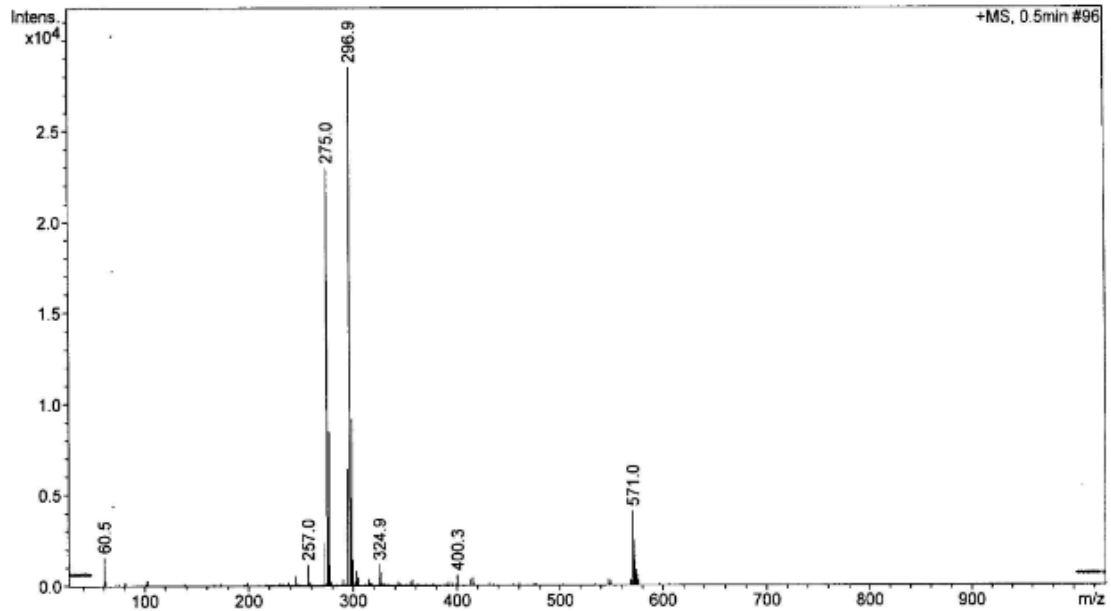

Bruker Daltonics DataAnalysis 3.4

printed: 3/24/2010 12:12:55 PM

Page 1 of 1

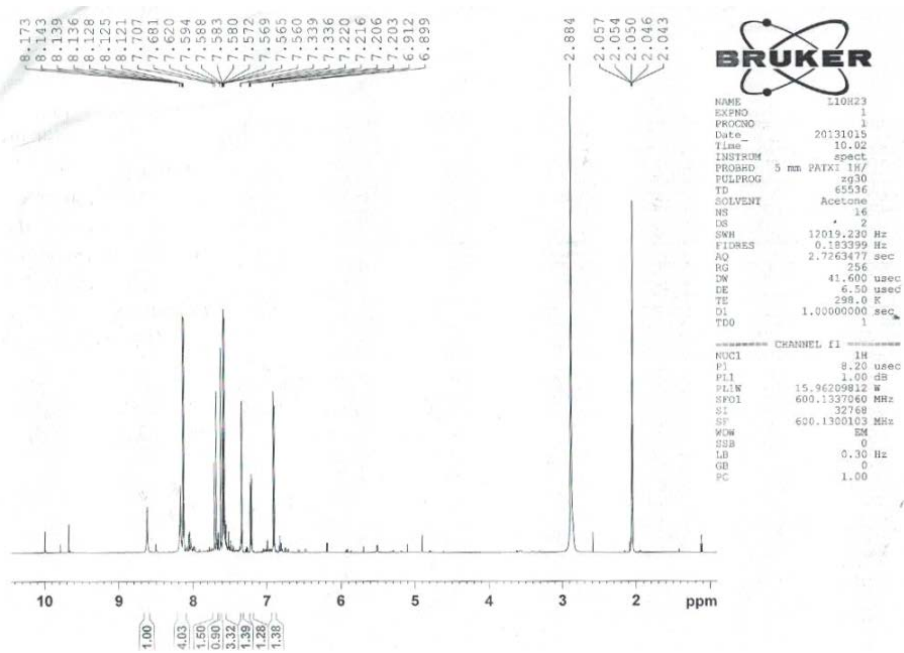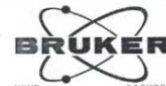

```

NAME      L10H23
EXPRO    1
PROCNO   1
Date_    20131015
Time     10.02
INSTRUM  spect
PROBHD   5 mm PATXI 1H/
PULPROG  zg30
TD       65536
SOLVENT  Acetone
NS       16
DS       2
SWH      12019.230 Hz
FIDRES   0.183399 Hz
AQ       2.7263477 sec
RG       256
DW       41.600 usec
DE       6.50 usec
TE       298.0 K
D1       1.00000000 sec
TD0      1
  
```

```

CHANNEL f1
NUC1     1H
P1       8.20 usec
PL1     1.00 dB
PL1W    15.96209812 W
SFO1    600.1337960 MHz
SI       32768
SF      600.1300103 MHz
WOW     EM
SFB     0
LB      0.30 Hz
GB      0
PC      1.00
  
```

Figure S11 LC-MS and <sup>1</sup>H NMR spectra of compound 9.

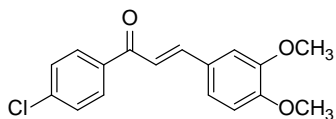

201700602-wjb-01 142 (2.374)

MS2 ES+  
9.76e8

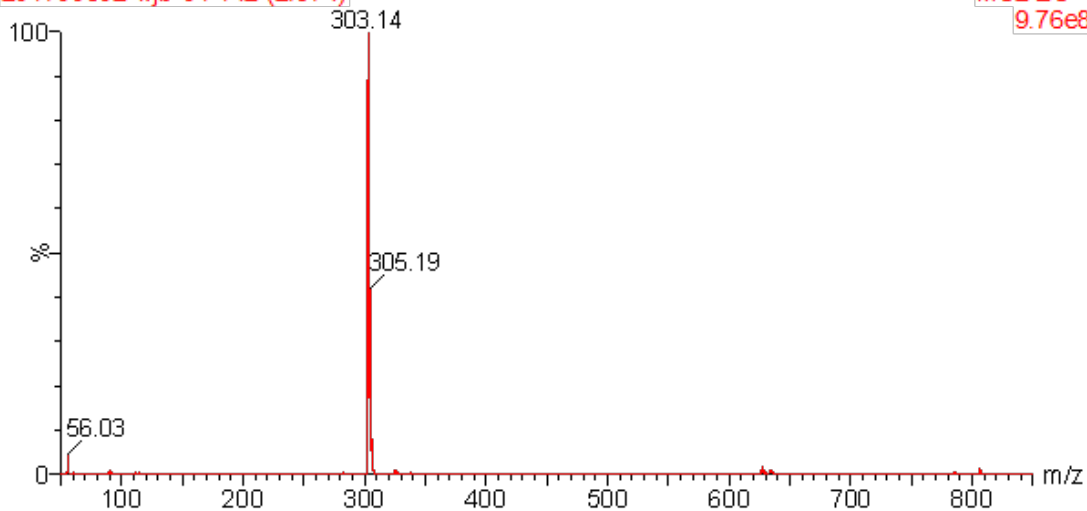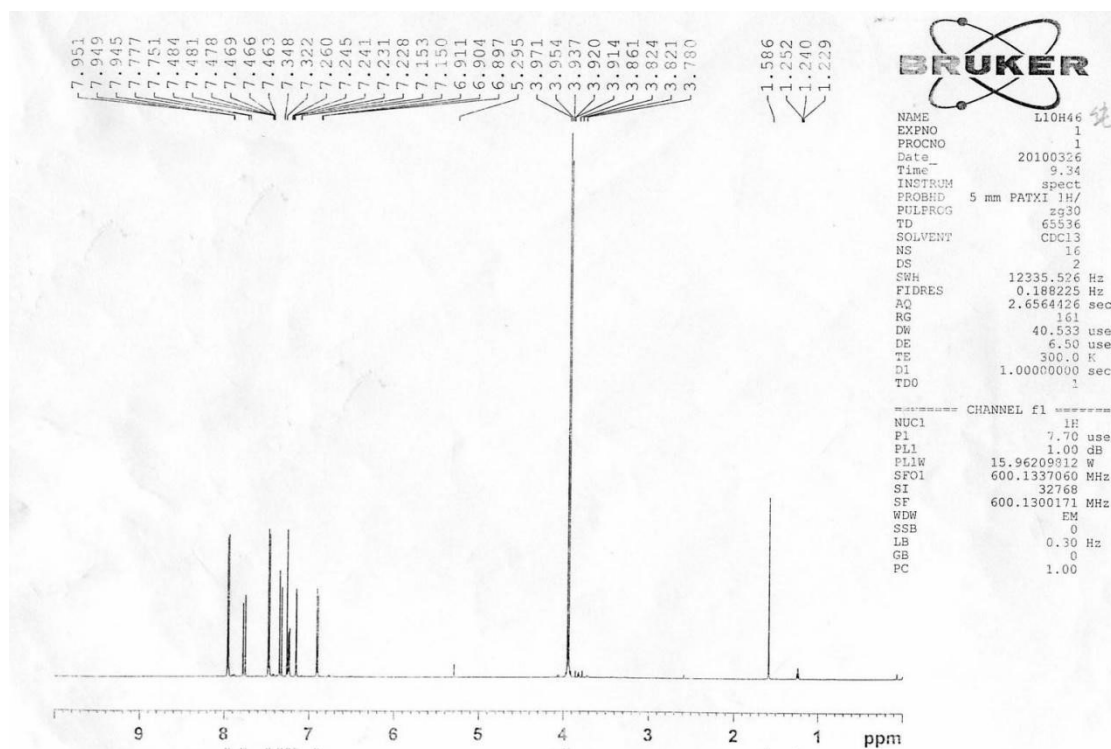

**BRUKER**

```

NAME      L10H46
EXPNO     1
PROCNO    1
Date_     20100326
Time      9.34
INSTRUM   spect
PROBHD    5 mm PATXI 1H/
PULPROG   zg30
TD         65536
SOLVENT   CDCl3
NS         16
DS         2
SWH        12335.526 Hz
FIDRES     0.188225 Hz
AQ         2.6564426 sec
RG         161
DW         40.533 usec
DE         6.50 usec
TE         300.0 K
D1         1.00000000 sec
D10        1
----- CHANNEL f1 -----
NUC1       1H
P1         7.70 usec
PL1        1.00 dB
PL1W       15.96209812 W
SFO1       600.1337060 MHz
SI         32768
SF         600.1300171 MHz
WDW        EM
SSB        0
LB         0.30 Hz
GB         0
PC         1.00
  
```

Figure S12 LC-MS and <sup>1</sup>H NMR spectra of compound 10.

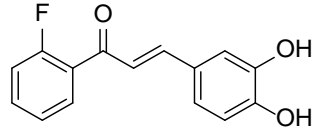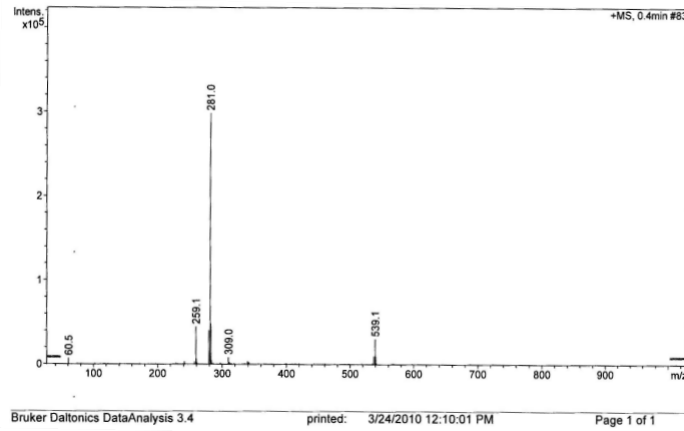

Bruker Daltonics DataAnalysis 3.4 printed: 3/24/2010 12:10:01 PM Page 1 of 1

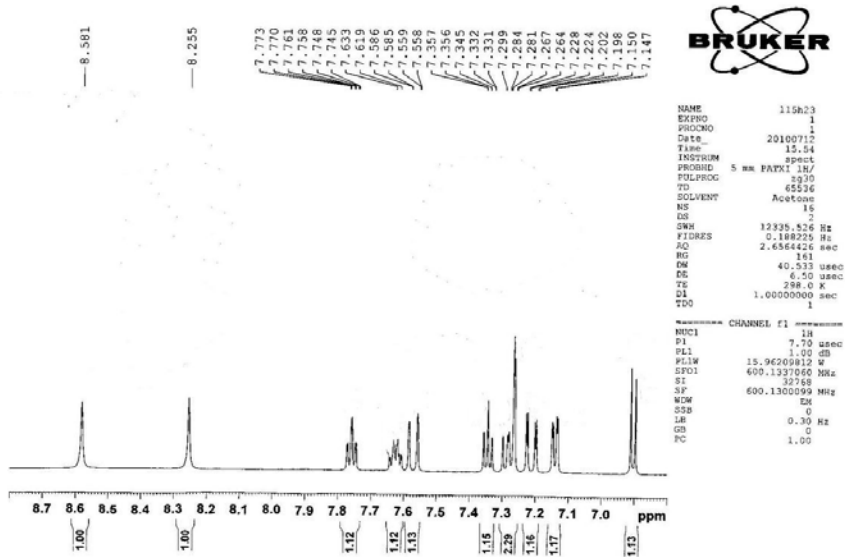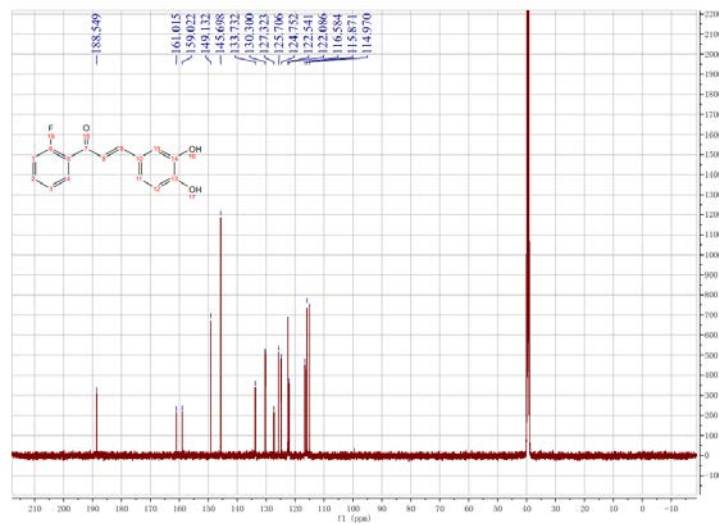

Figure S13 LC-MS, <sup>1</sup>H NMR and <sup>13</sup>C NMR spectra of compound 11.



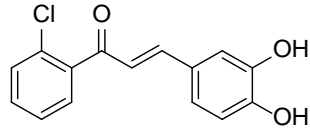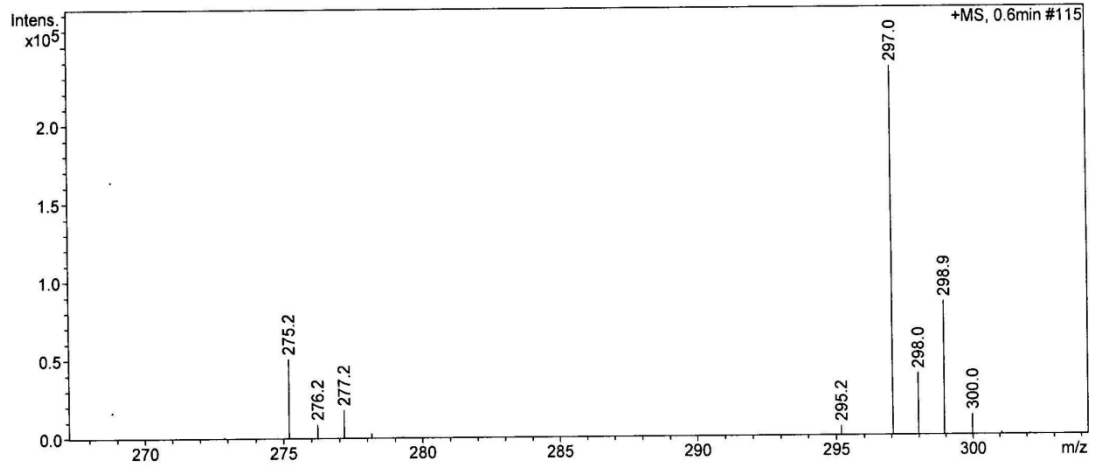

Bruker Daltonics DataAnalysis 3.4

printed: 3/16/2010 4:42:16 PM

Page 1 of 1

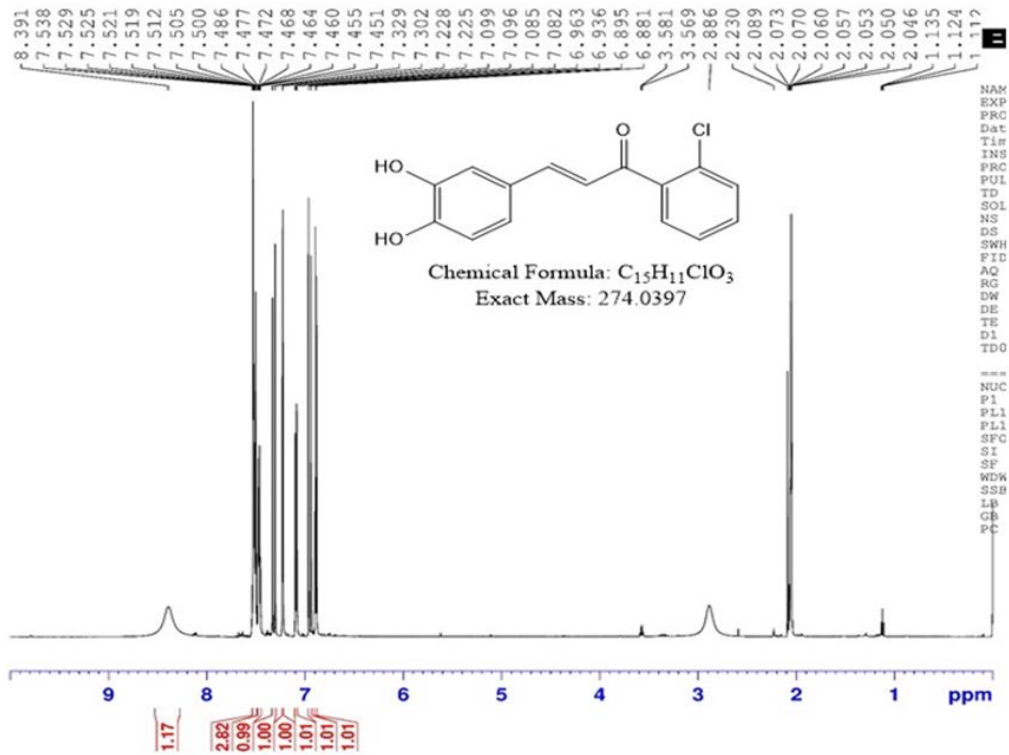

Figure S15 LC-MS and <sup>1</sup>H NMR spectra of compound 13.



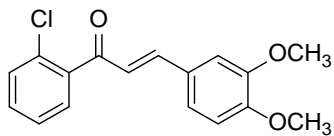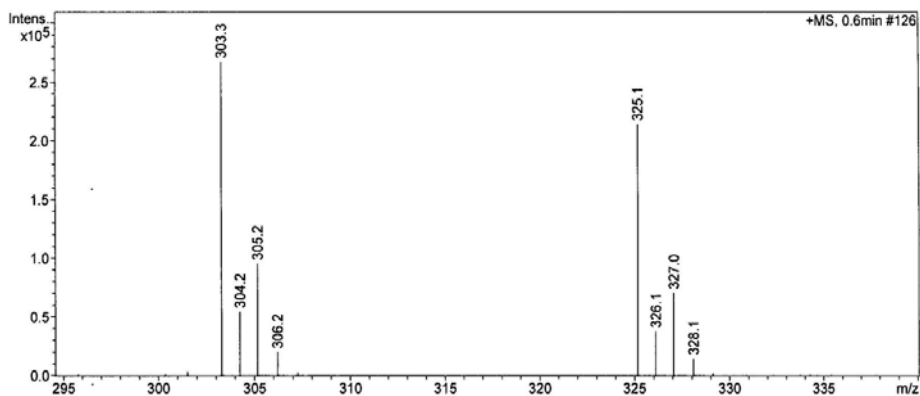

Bruker Daltonics DataAnalysis 3.4

printed: 3/16/2010 4:40:21 PM

Page 1 of 1

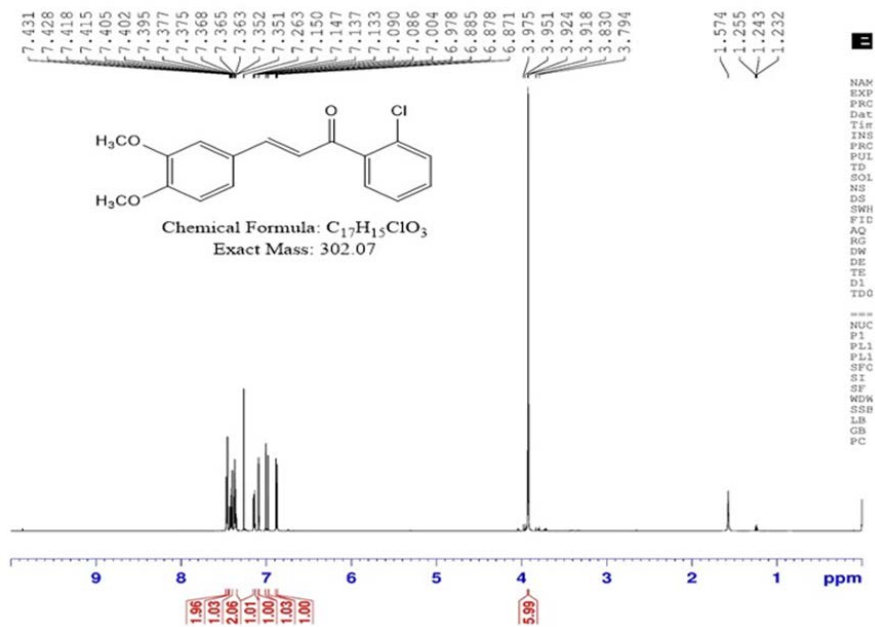

Figure S16 LC-MS and <sup>1</sup>H NMR spectra of compound 14.

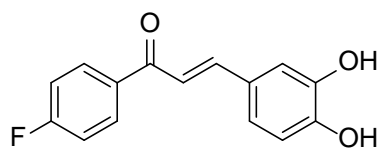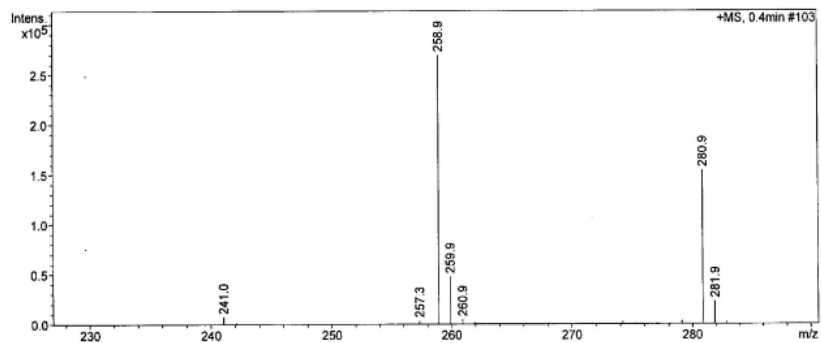

Bruker Daltonics DataAnalysis 3.4 printed: 3/19/2010 8:15:25 PM Page 1 of 1

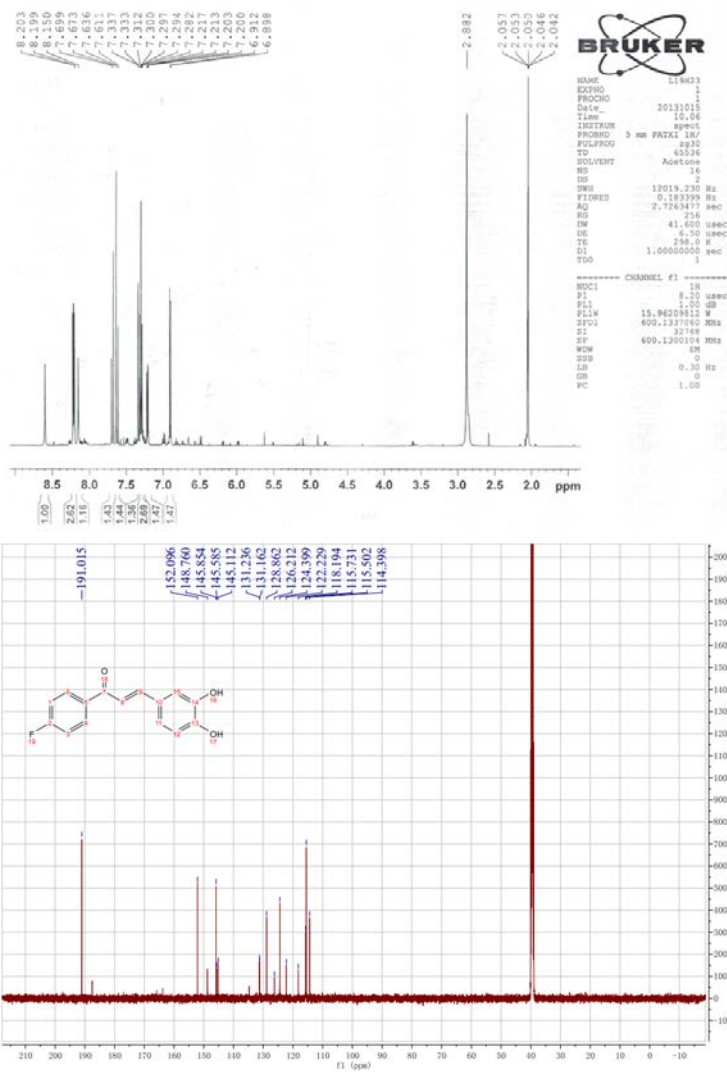

Figure S17 LC-MS, <sup>1</sup>H NMR and <sup>13</sup>C NMR spectra of compound 15.

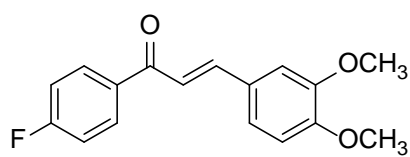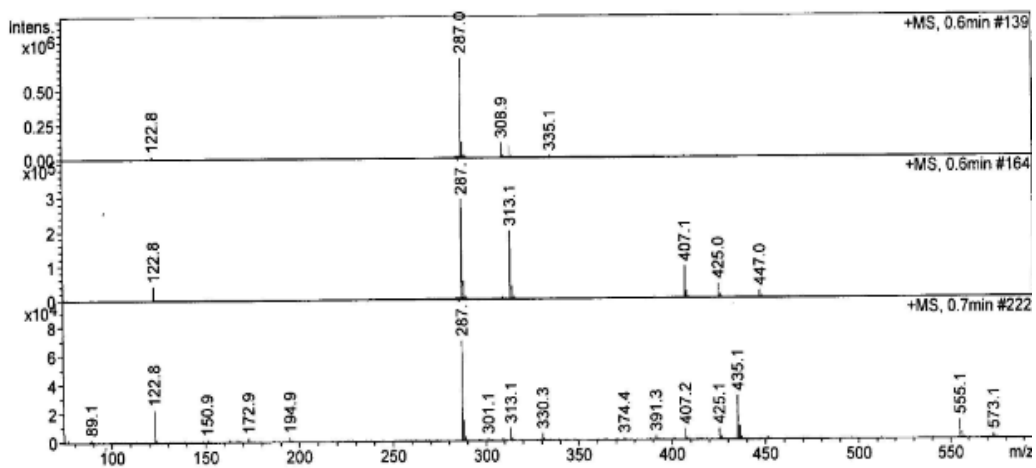

Bruker Daltonics DataAnalysis 3.4

printed: 3/19/2010 8:16:41 PM

Page 1 of 1

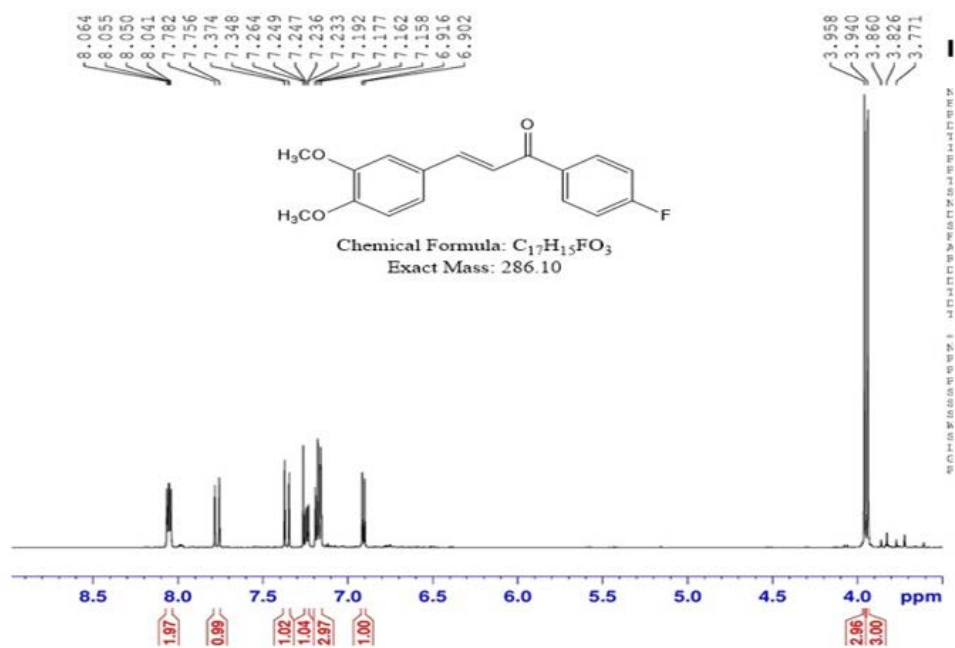

Figure S18 LC-MS and <sup>1</sup>H NMR spectra of compound 16.

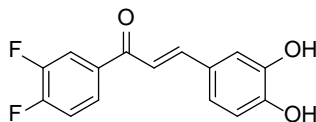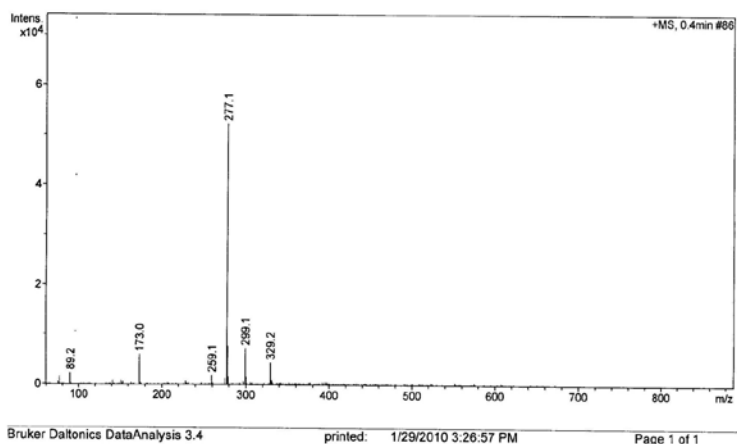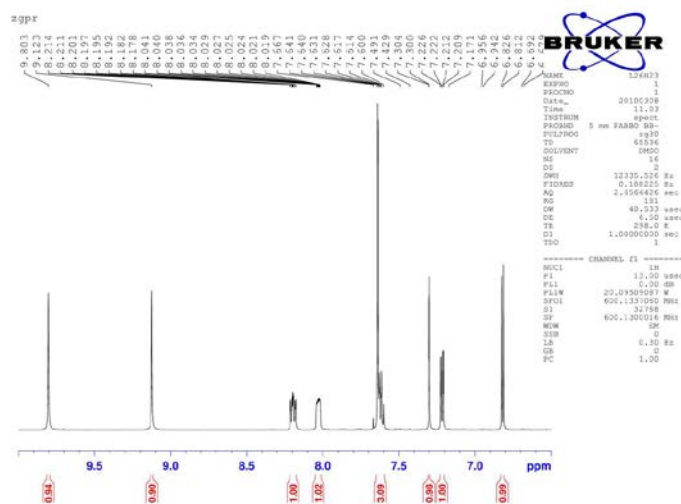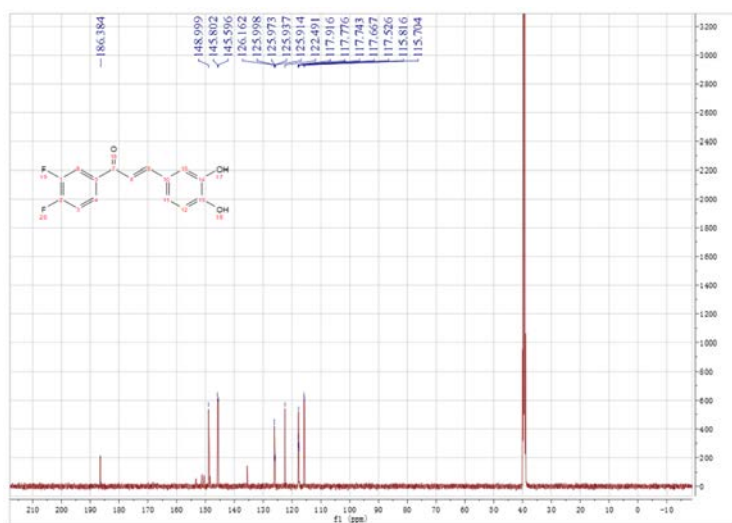

Figure S19 LC-MS, <sup>1</sup>H NMR and <sup>13</sup>C NMR spectra of compound 17.

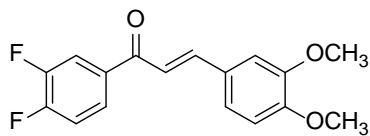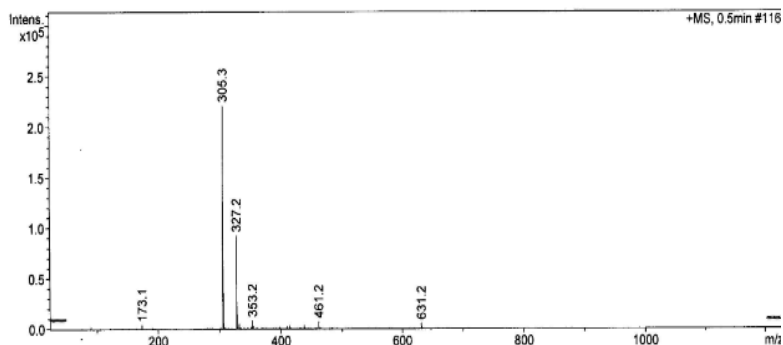

Bruker Daltonics DataAnalysis 3.4 printed: 1/28/2010 2:39:31 PM Page 1 of 1

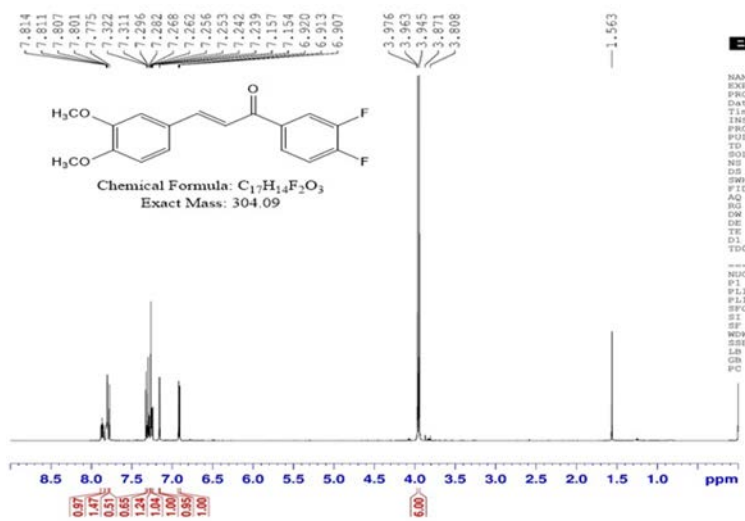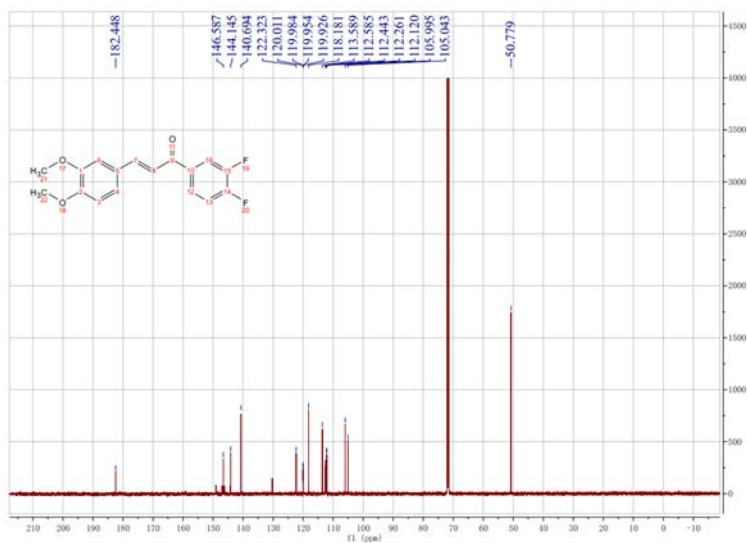

Figure S20 LC-MS,  $^1\text{H}$  NMR and  $^{13}\text{C}$  NMR spectra of compound 18.

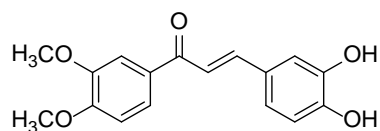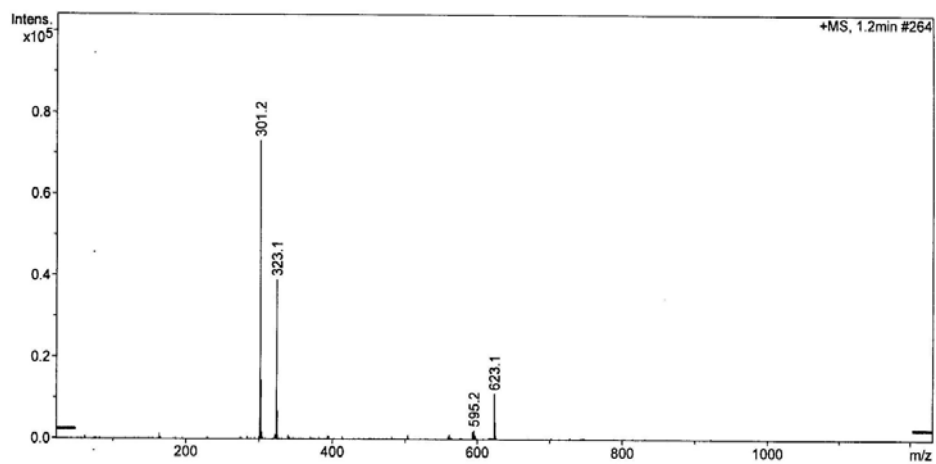

Bruker Daltonics DataAnalysis 3.4

printed: 1/18/2010 6:57:17 PM

Page 1 of 1

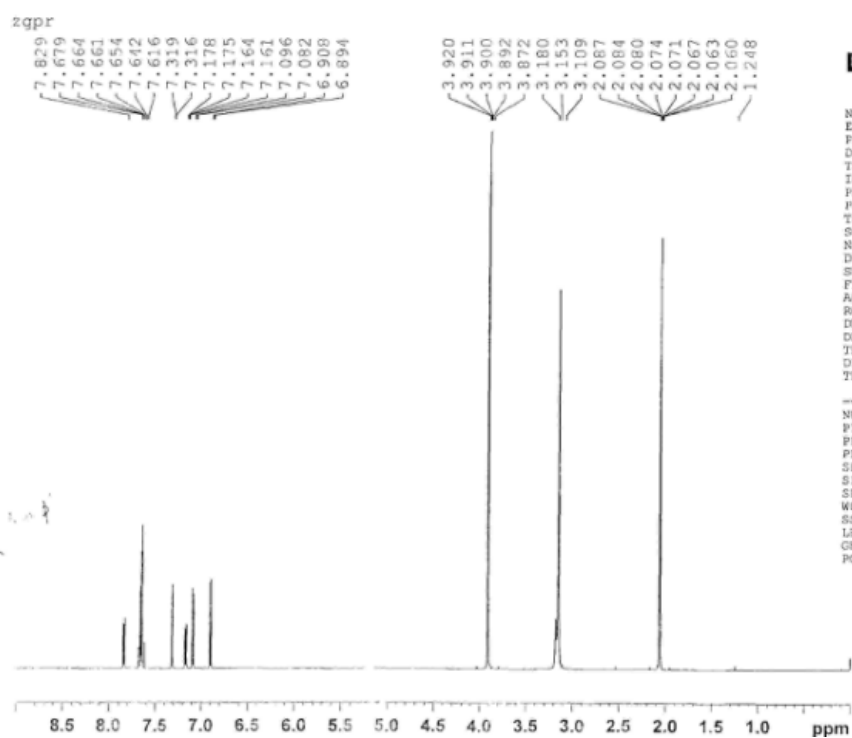

Figure S21 LC-MS and <sup>1</sup>H NMR spectra of compound 19.

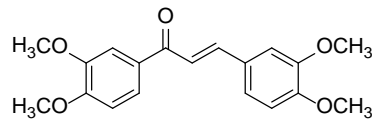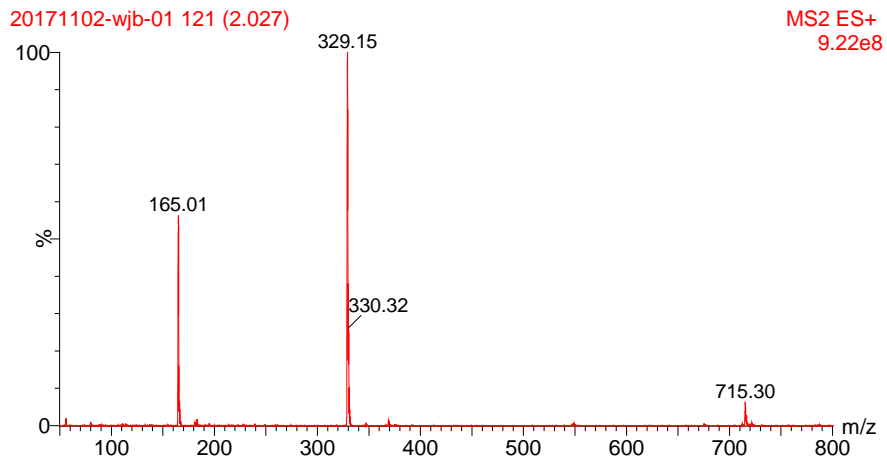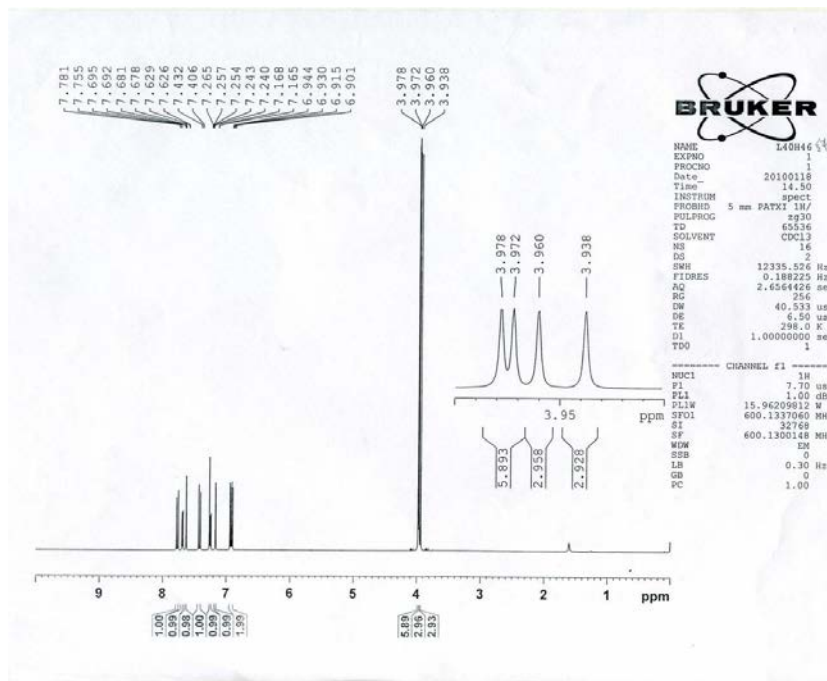

Figure S22 LC-MS and <sup>1</sup>H NMR spectra of compound 20.

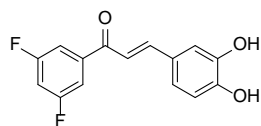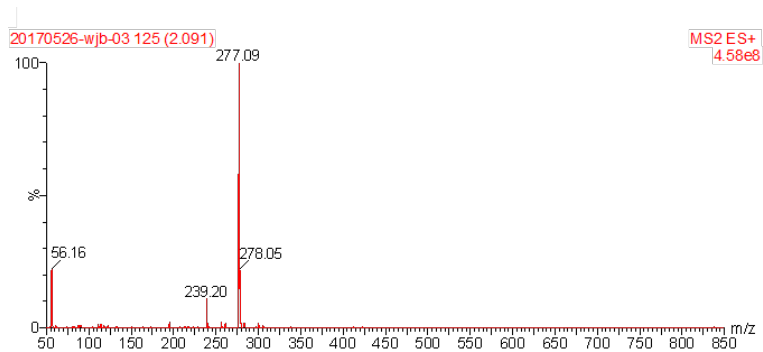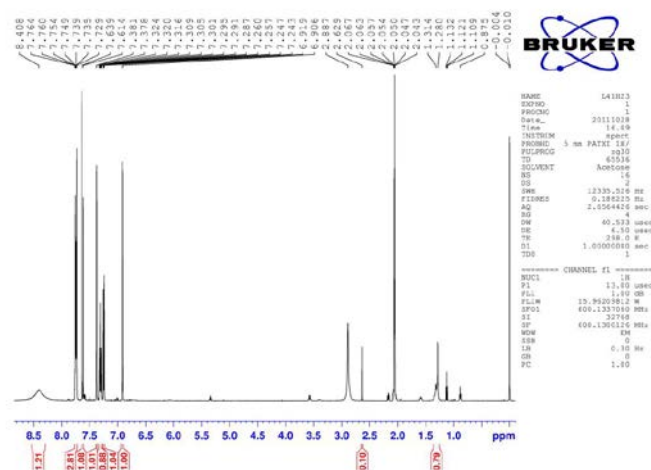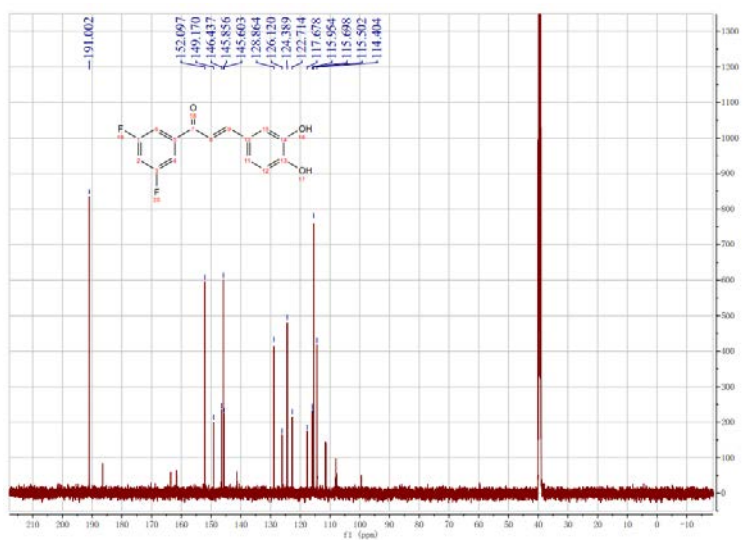

Figure S23 LC-MS, <sup>1</sup>H NMR and <sup>13</sup>C NMR spectra of compound 21.



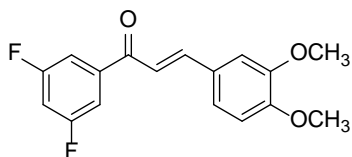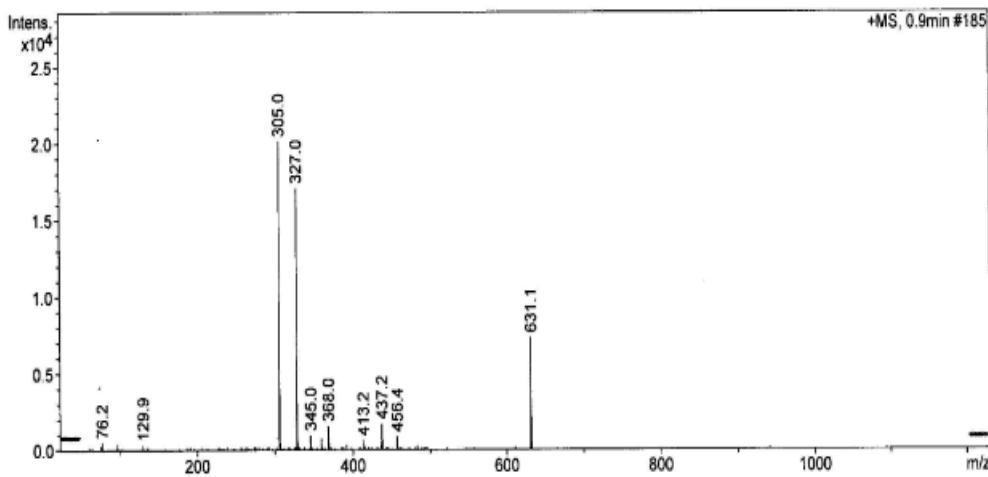

Bruker Daltonics DataAnalysis 3.4

printed: 1/21/2010 4:36:12 PM

Page 1 of 1

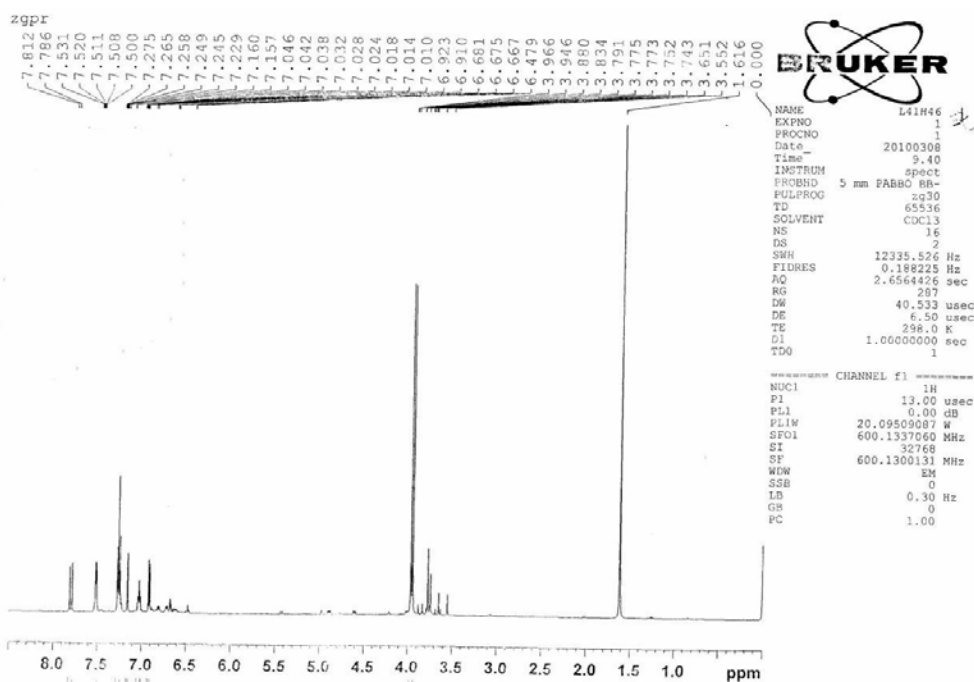

Figure S24 LC-MS and <sup>1</sup>H NMR spectra of compound 22.



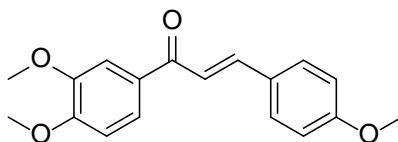

20171031-WJB-02 132 (2.211)

MS2 ES+  
1.27e9

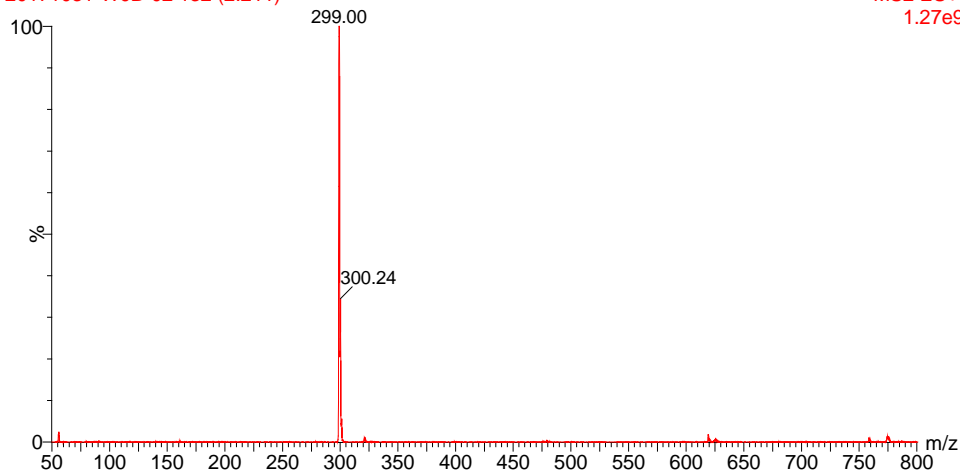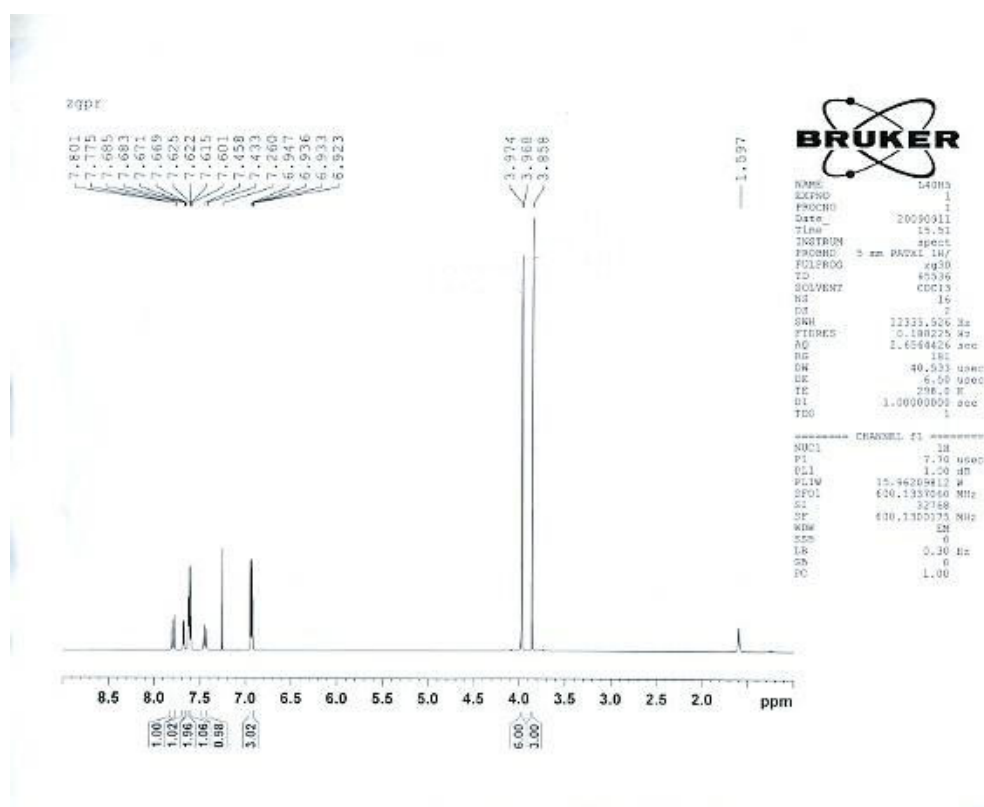

Figure S26 LC-MS and <sup>1</sup>H NMR spectra of compound 24.

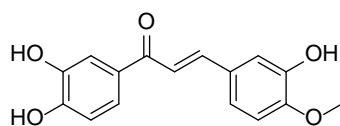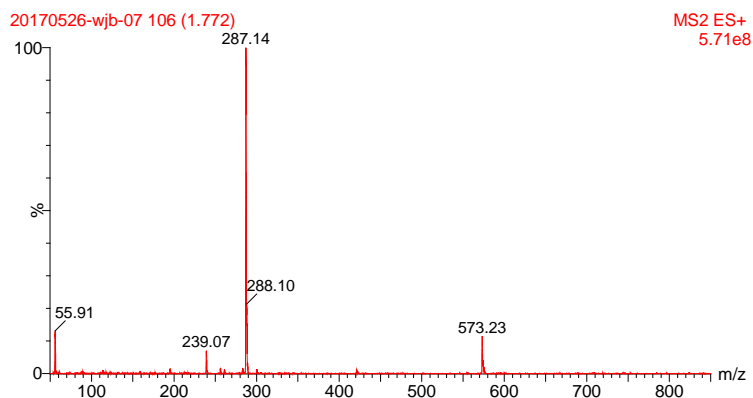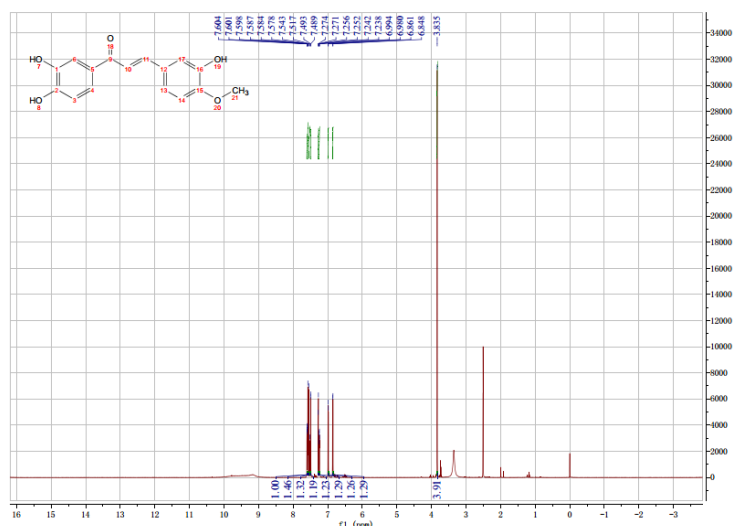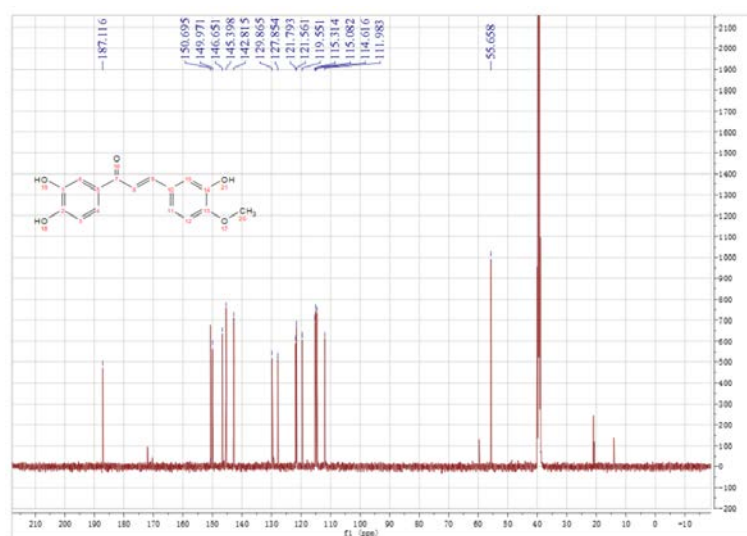

Figure S27 LC-MS, <sup>1</sup>H NMR and <sup>13</sup>C NMR spectra of compound **25**.

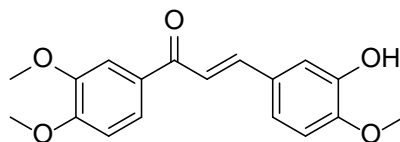

20170606-WJB-01 120 (2.007)

MS2 ES+  
1.27e9

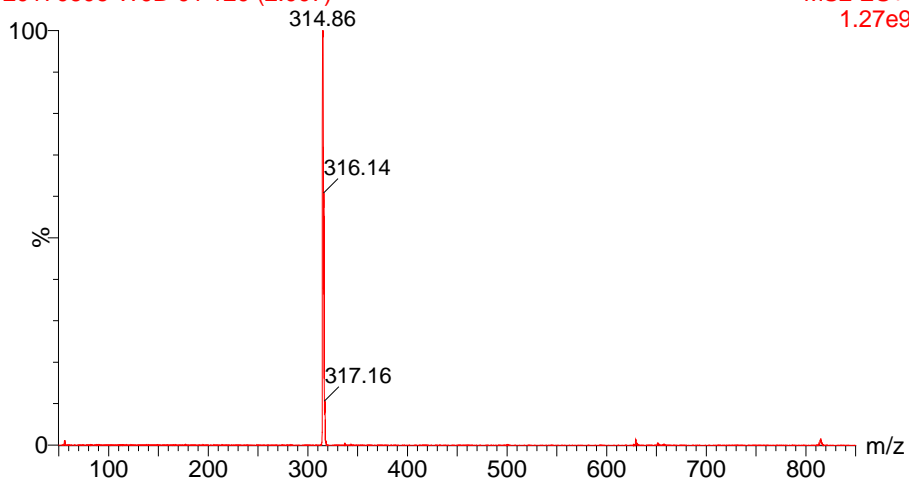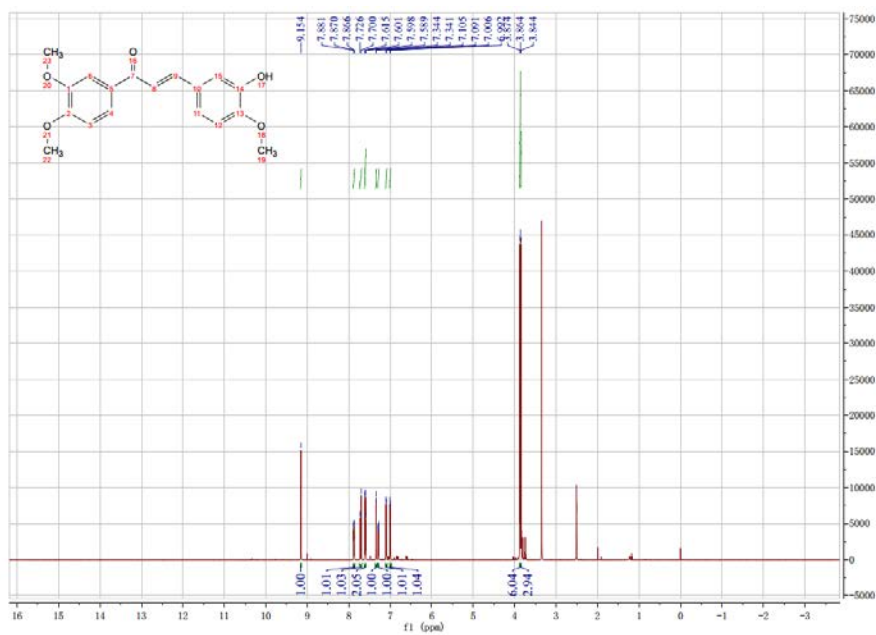

Figure S28 LC-MS and <sup>1</sup>H NMR spectra of compound 26.

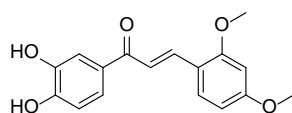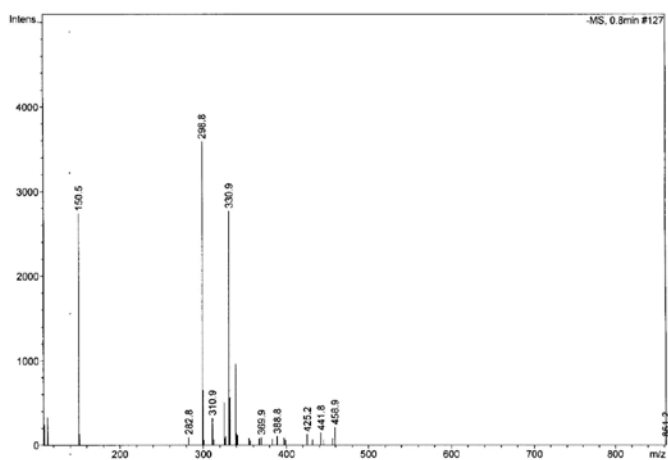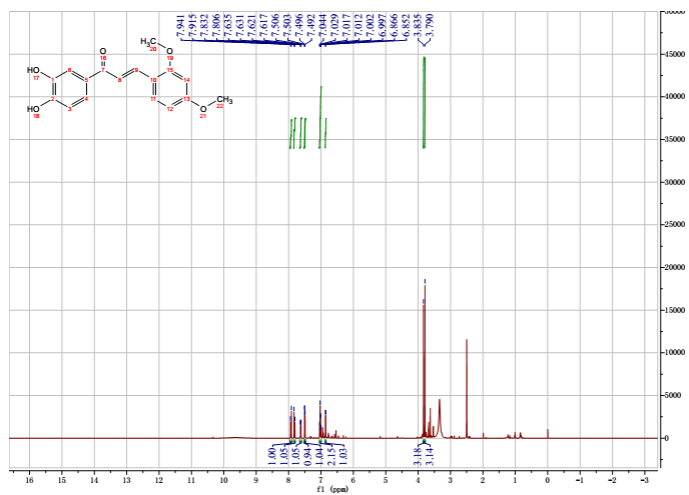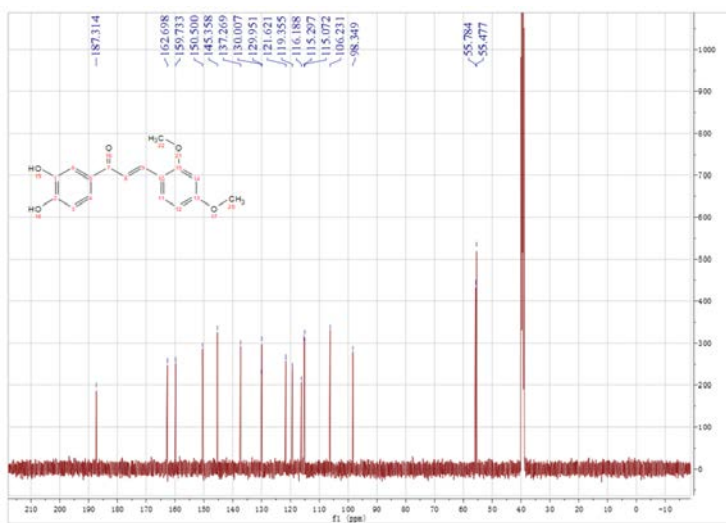

Figure S29 LC-MS, <sup>1</sup>H NMR and <sup>13</sup>C NMR spectra of compound 27.



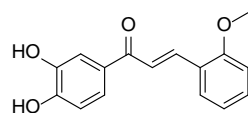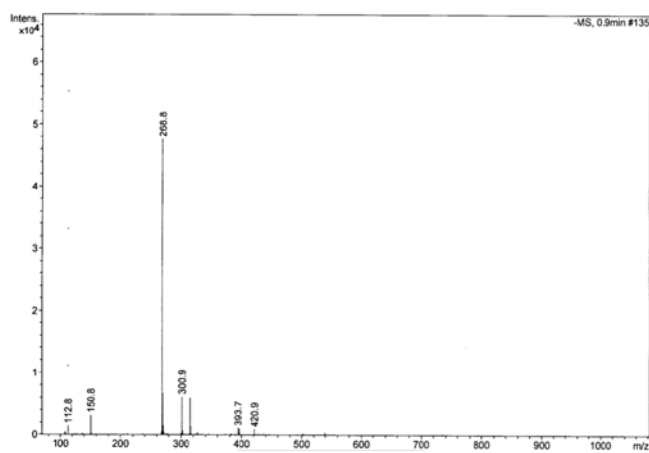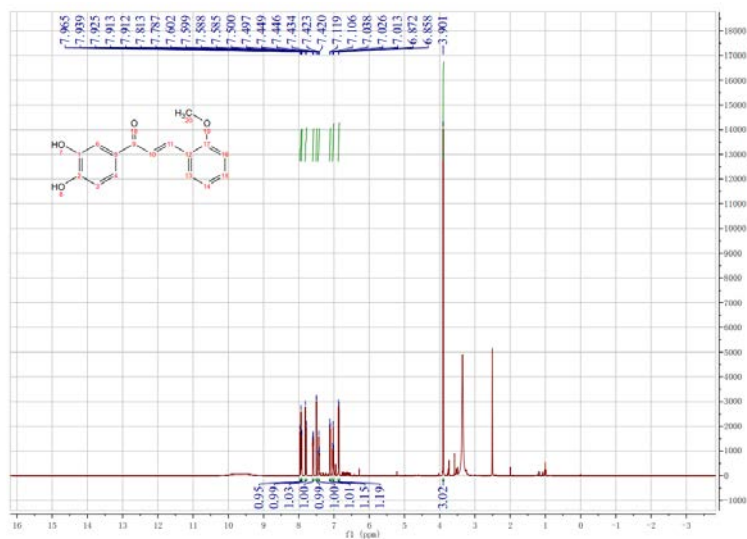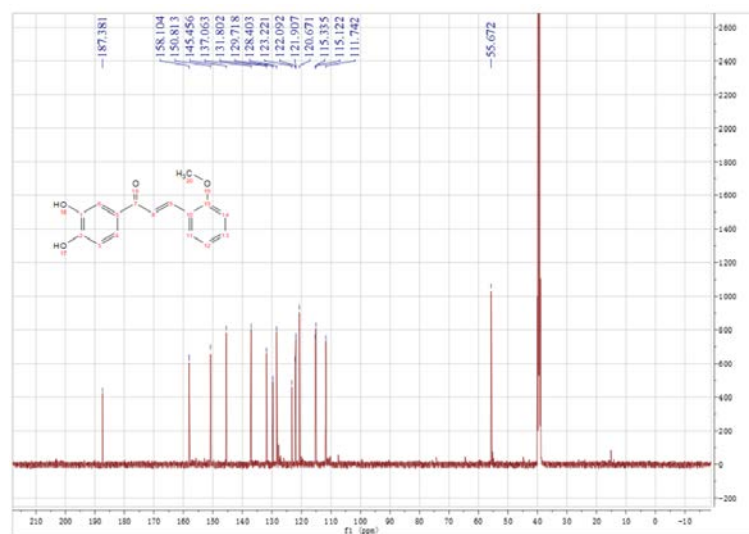

Figure S31 LC-MS, <sup>1</sup>H NMR and <sup>13</sup>C NMR spectra of compound 29.



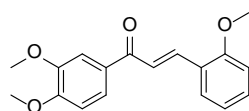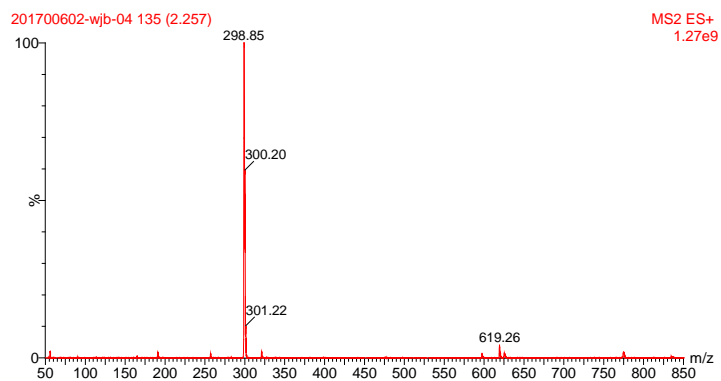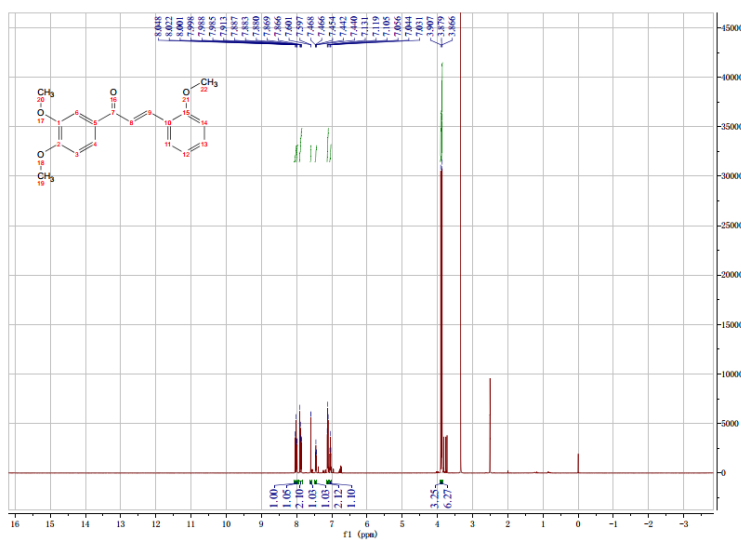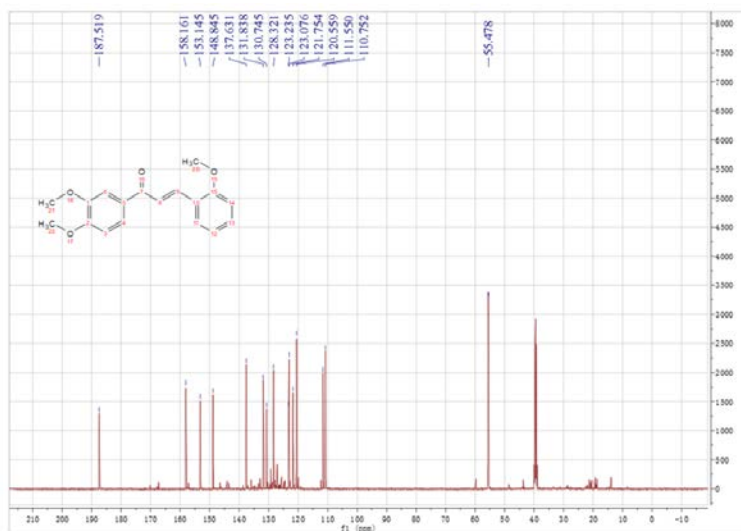

Figure S32 LC-MS, <sup>1</sup>H NMR and <sup>13</sup>C NMR spectra of compound 30.

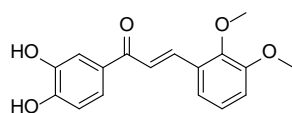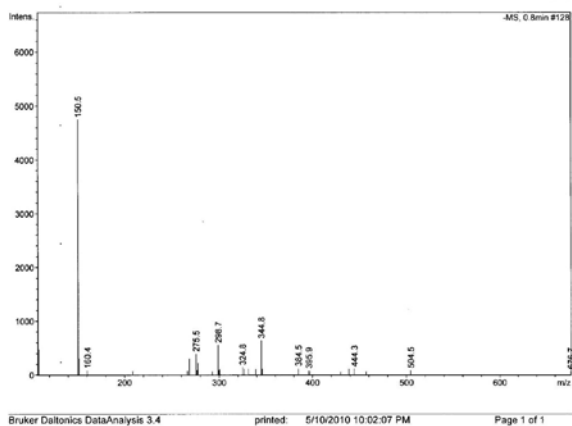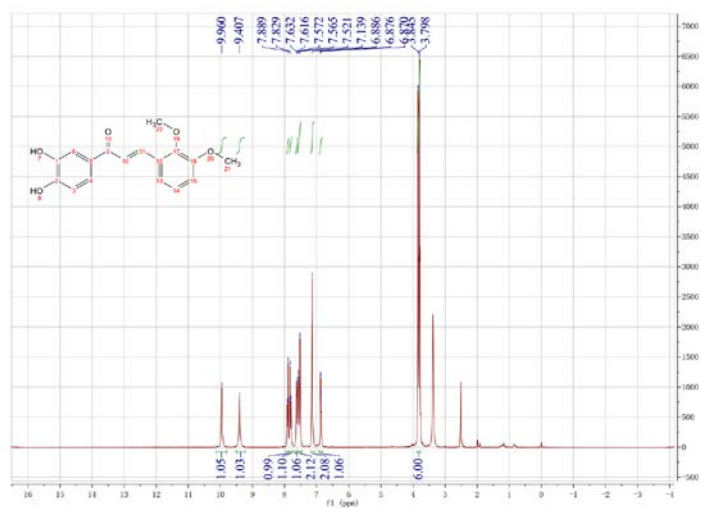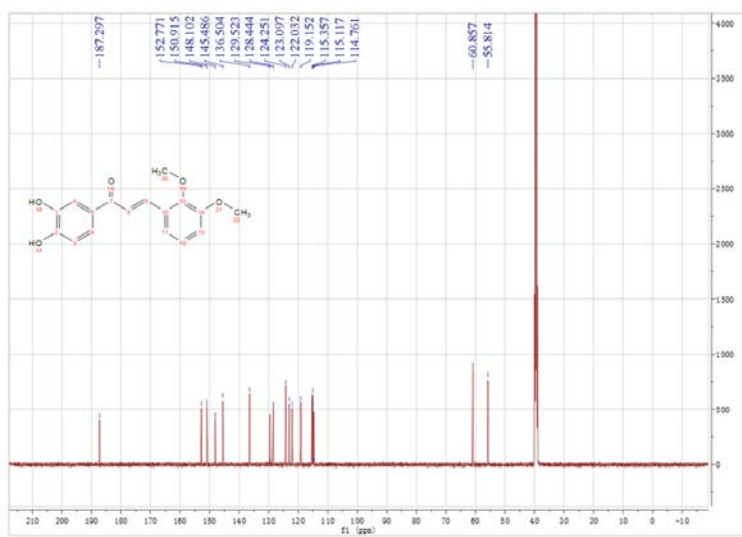

Figure S33 LC-MS, <sup>1</sup>H NMR and <sup>13</sup>C NMR spectra of compound 31.

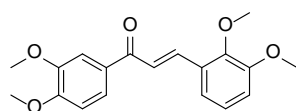

20181225-xjw-11 66 (2.217)

1: MS2 ES+  
1.26e9

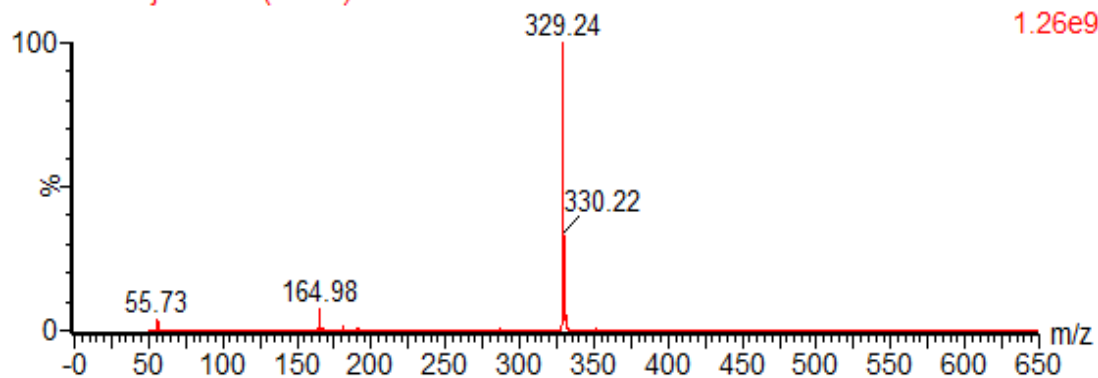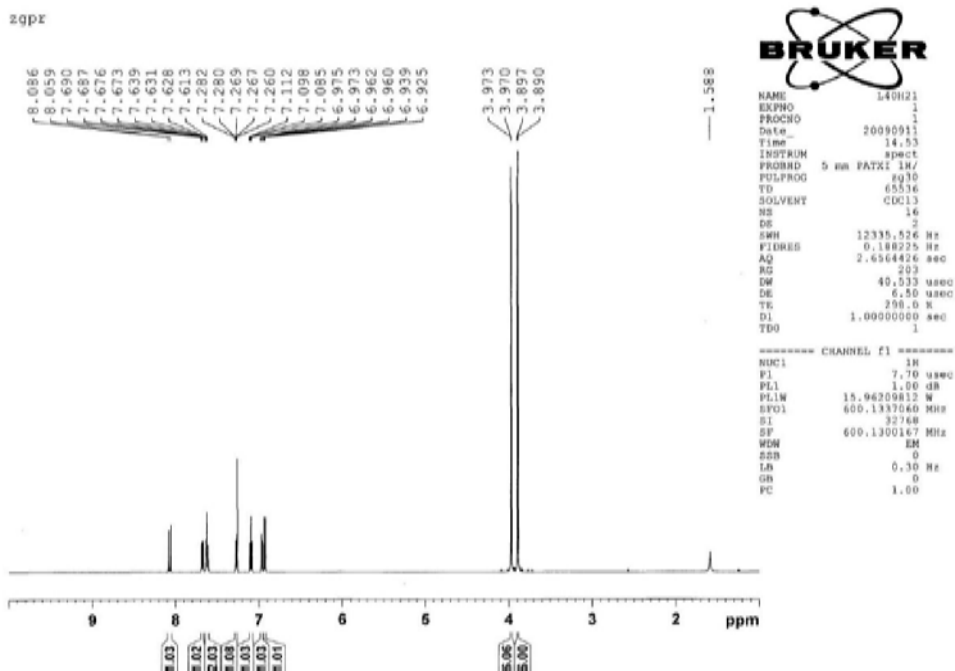

Figure S34 LC-MS and <sup>1</sup>H NMR spectra of compound 32.

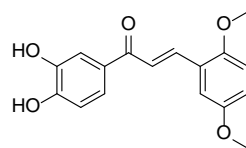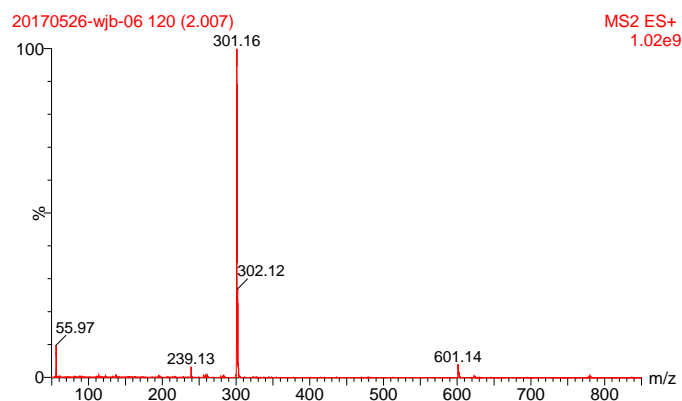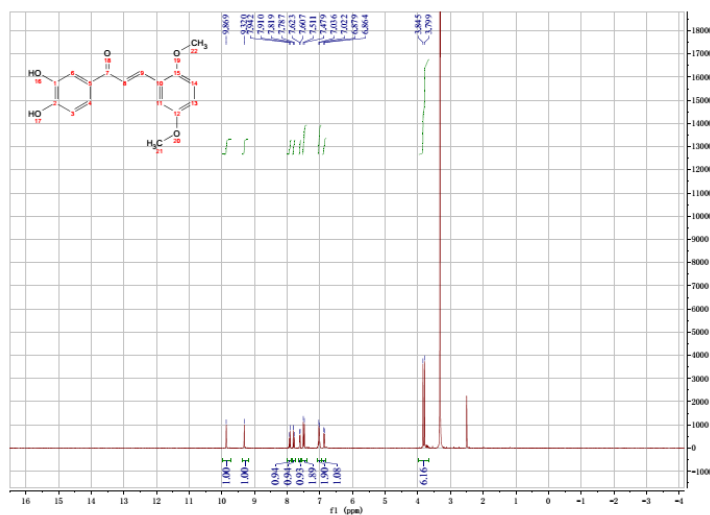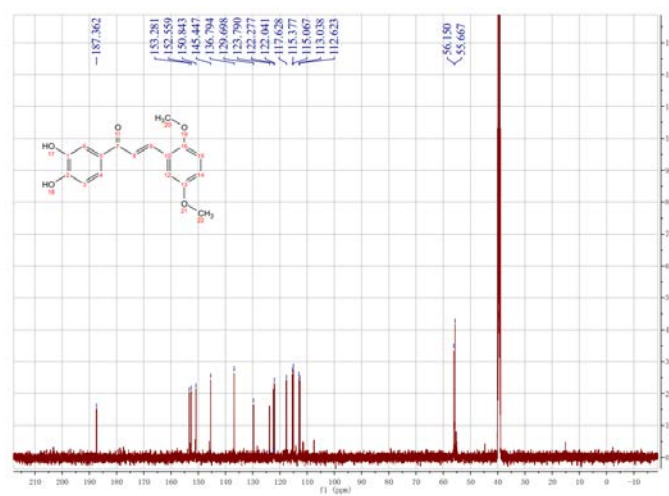

Figure S35 LC-MS, <sup>1</sup>H NMR and <sup>13</sup>C NMR spectra of compound 33.

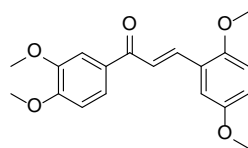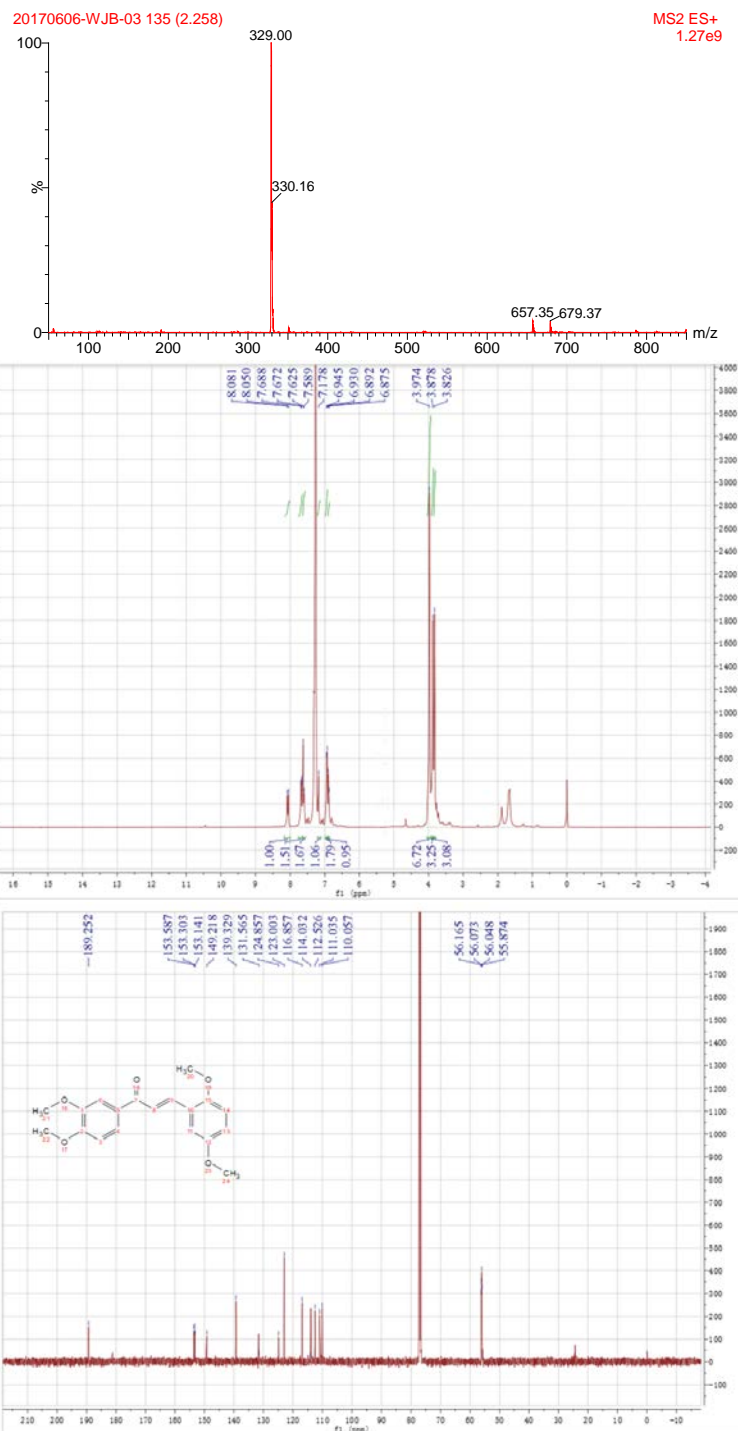

Figure S36 LC-MS, <sup>1</sup>H NMR and <sup>13</sup>C NMR spectra of compound 34.

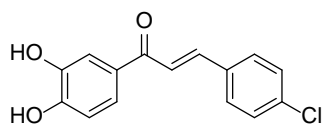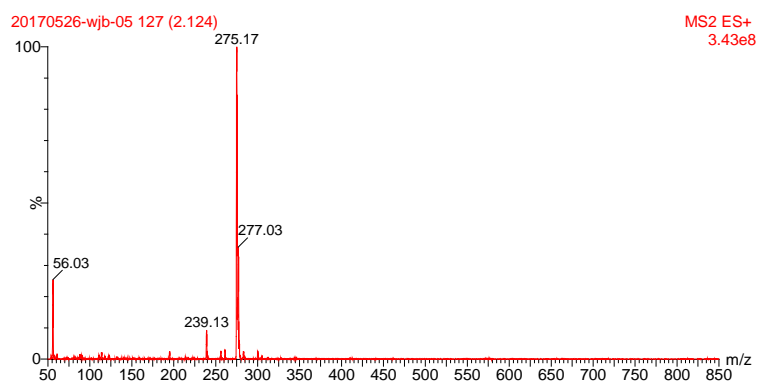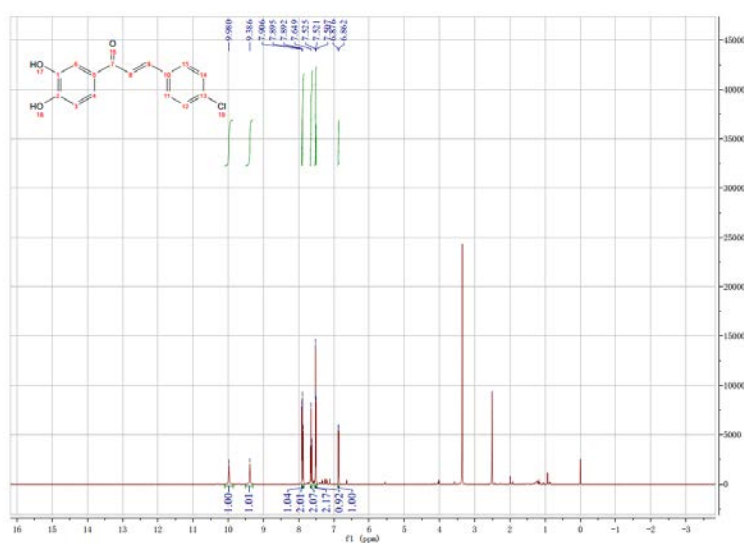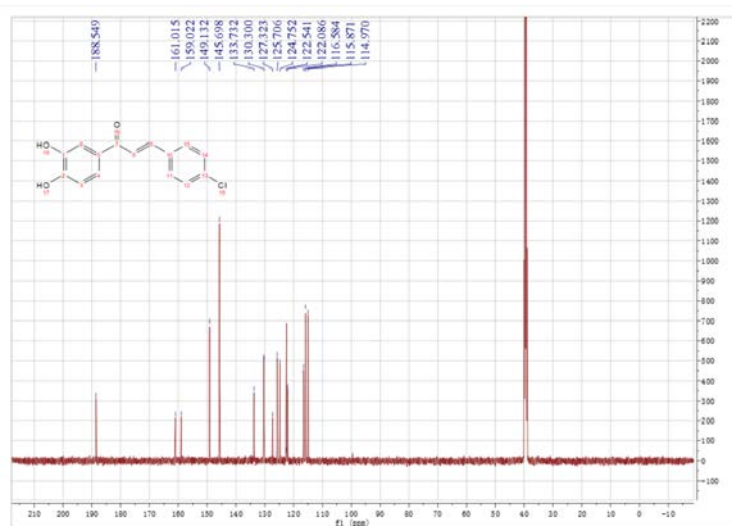

Figure S37 LC-MS, <sup>1</sup>H NMR and <sup>13</sup>C NMR spectra of compound 35.

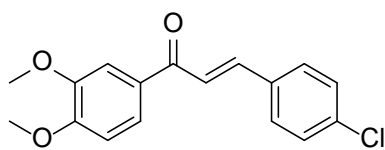

20170526-wjb-02 142 (2.375)

MS2 ES+  
1.06e9

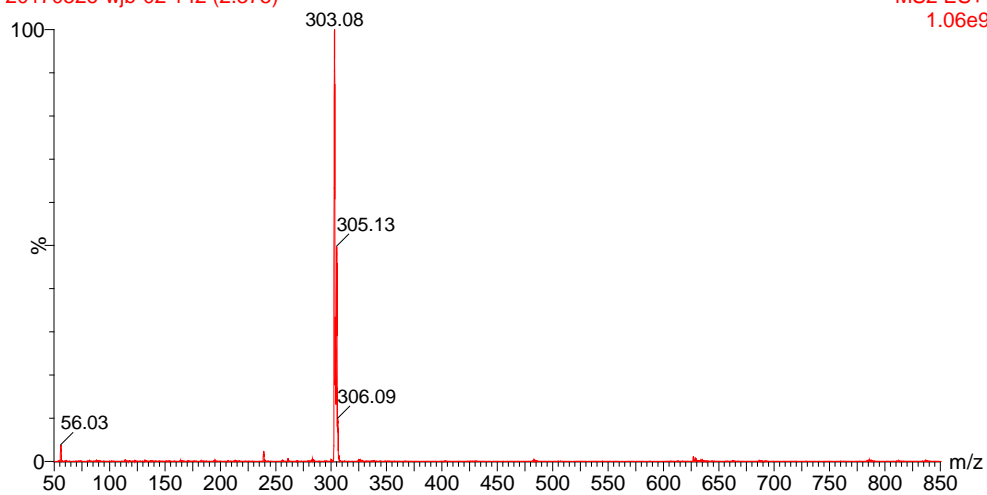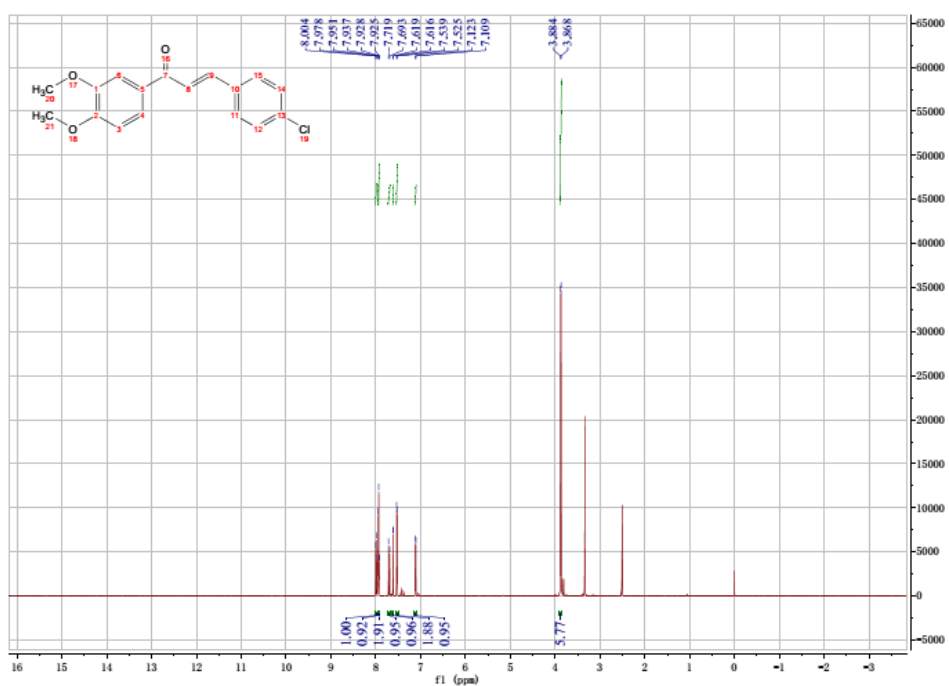

Figure S38 LC-MS, <sup>1</sup>H NMR and <sup>13</sup>C NMR spectra of compound 36.

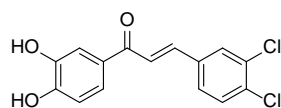

20180821-XJW-02 169 (2.832)

MS2 ES+  
3.90e7

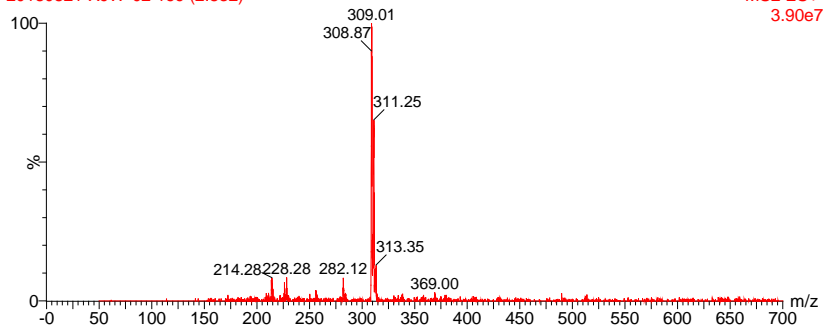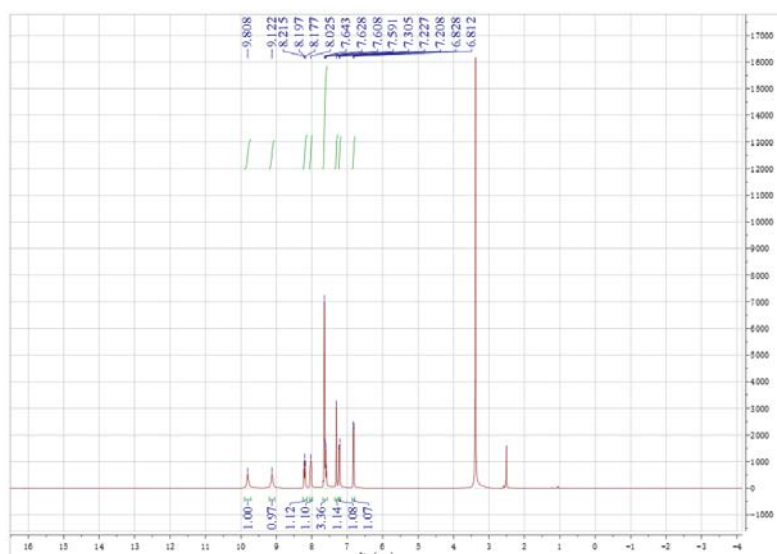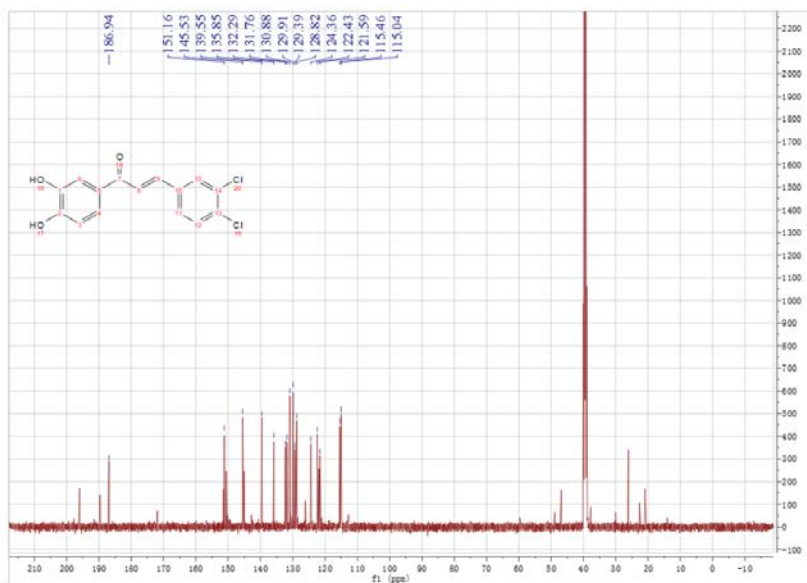

Figure S39 LC-MS, <sup>1</sup>H NMR and <sup>13</sup>C NMR spectra of compound 37.



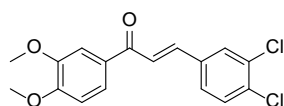

20170526-wjb-01 150 (2.509)

MS2 ES+  
2.28e8

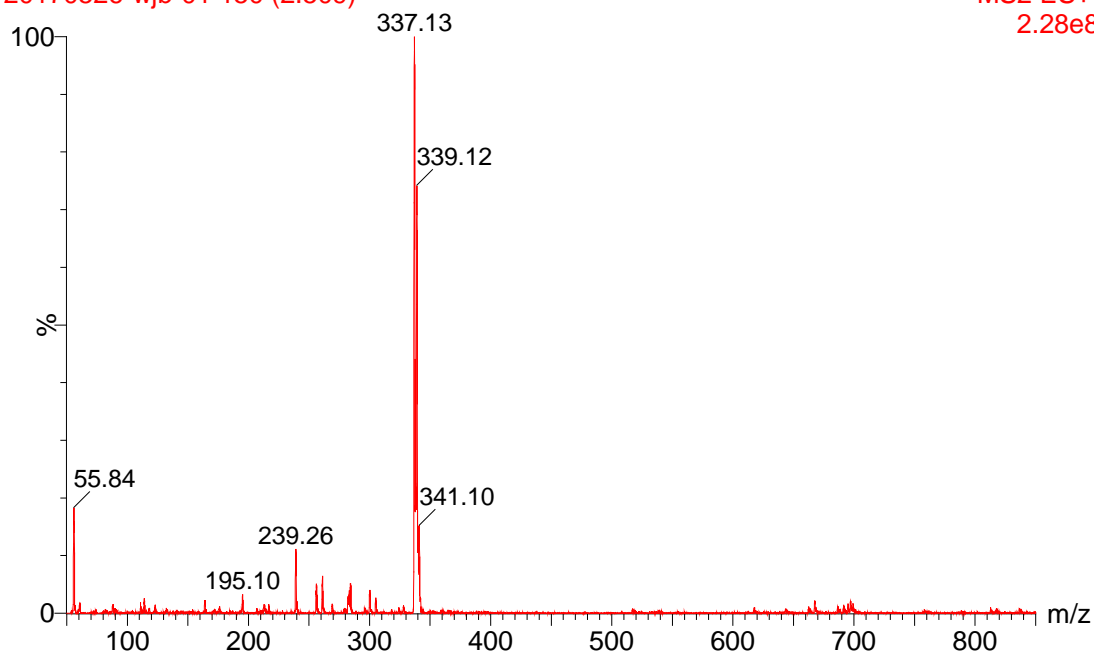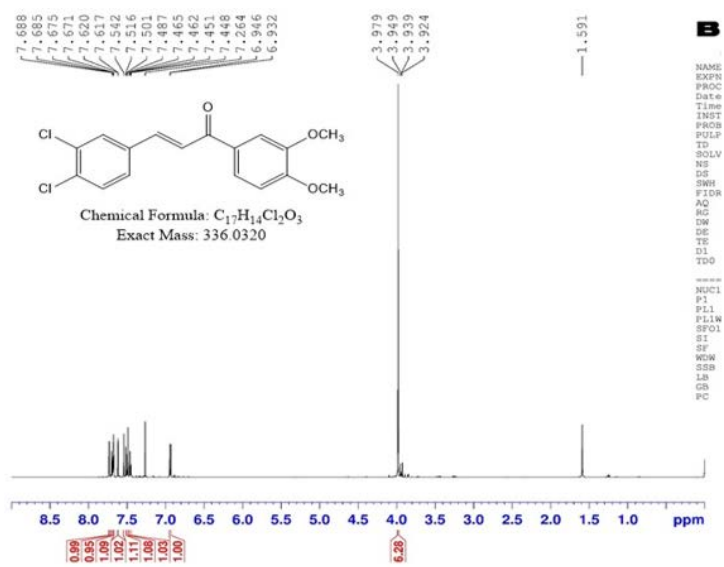

Figure S40 LC-MS and <sup>1</sup>H NMR spectra of compound 38.

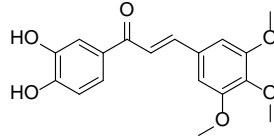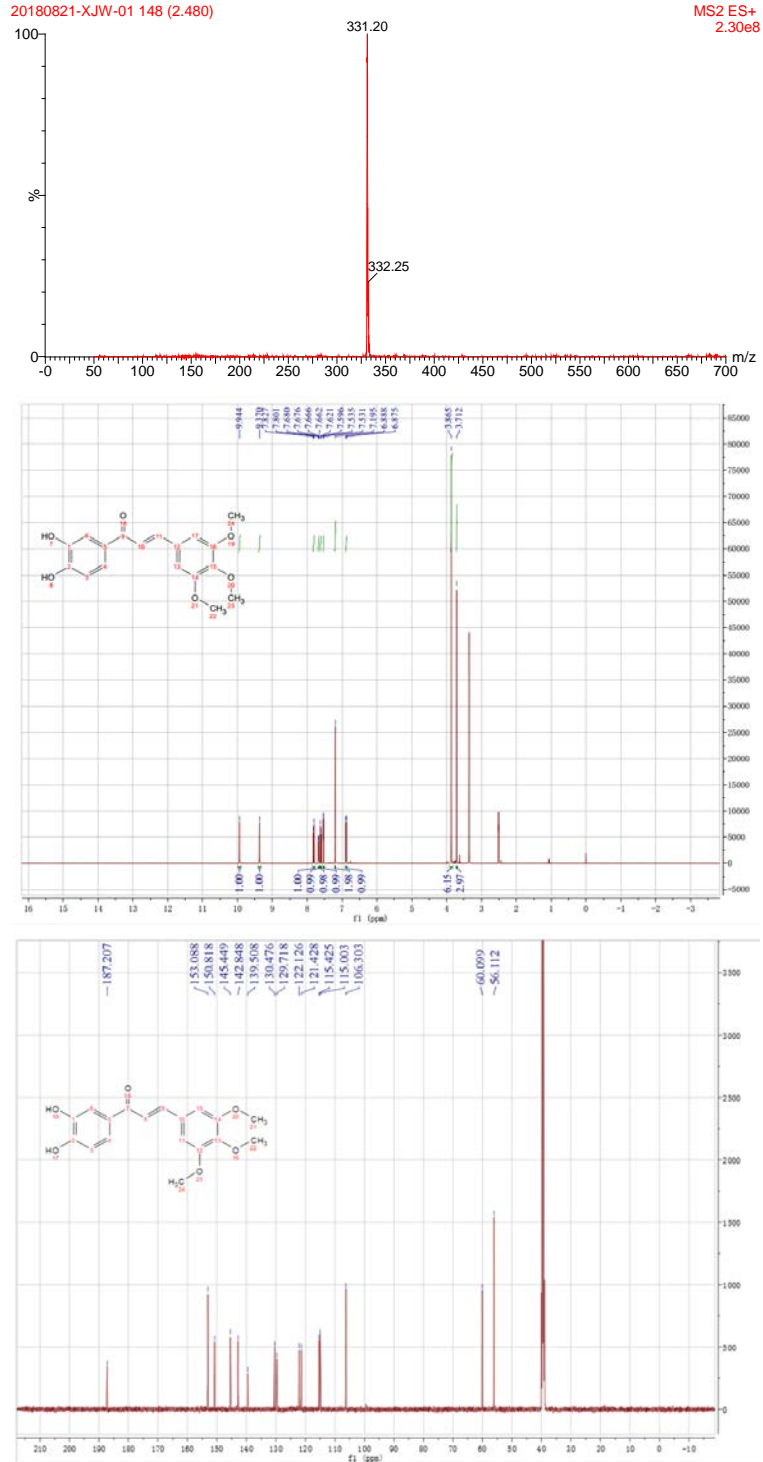

Figure S41 LC-MS,  $^1\text{H}$  NMR and  $^{13}\text{C}$  NMR spectra of compound **39**.

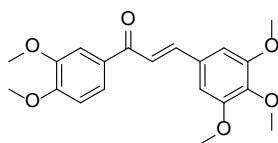

20171031-WJB-04 128 (2.145)

MS2 ES+  
1.09e9

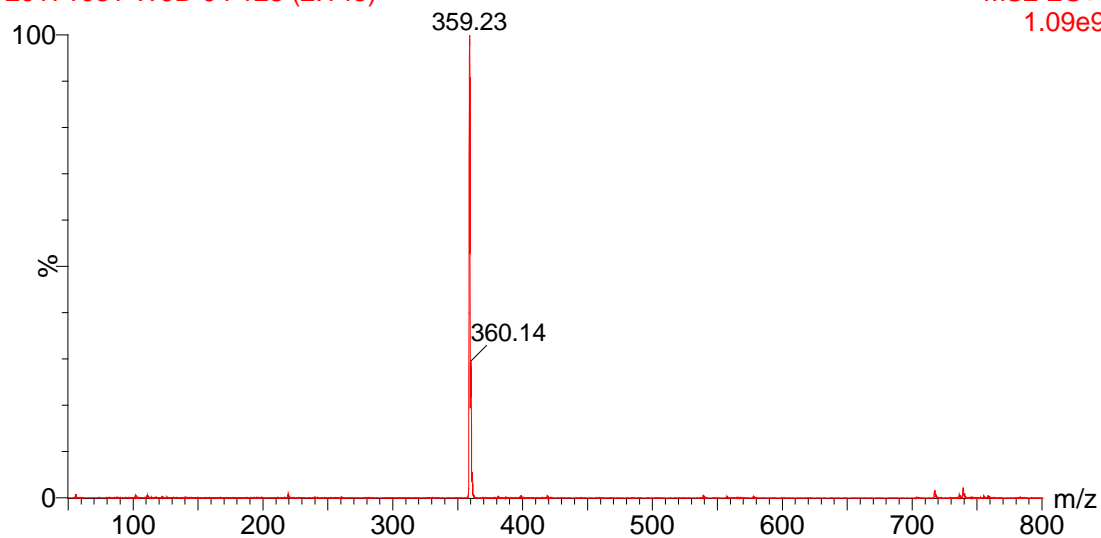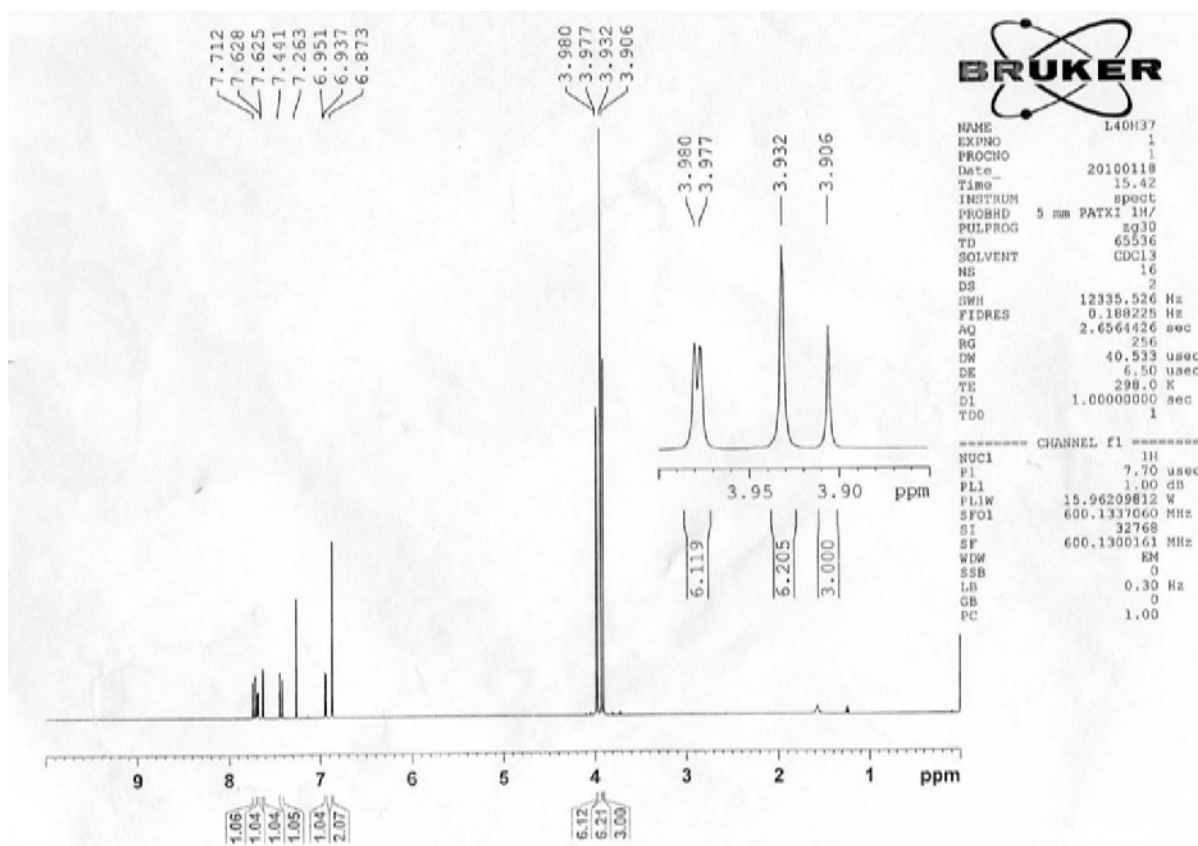

Figure S42 LC-MS and <sup>1</sup>H NMR spectra of compound 40.

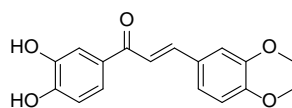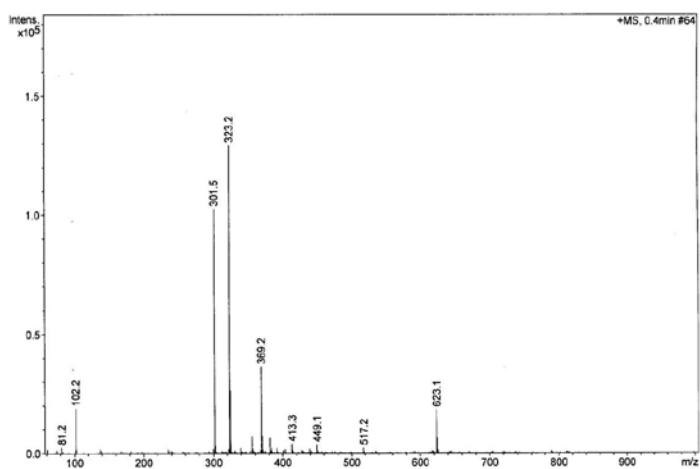

Bruker Daltonics DataAnalysis 3.4 printed: 4/15/2010 8:12:51 PM Page 1 of 1

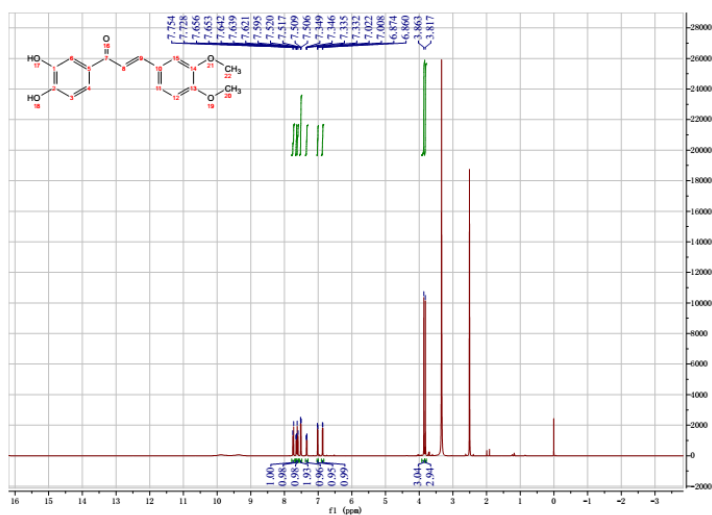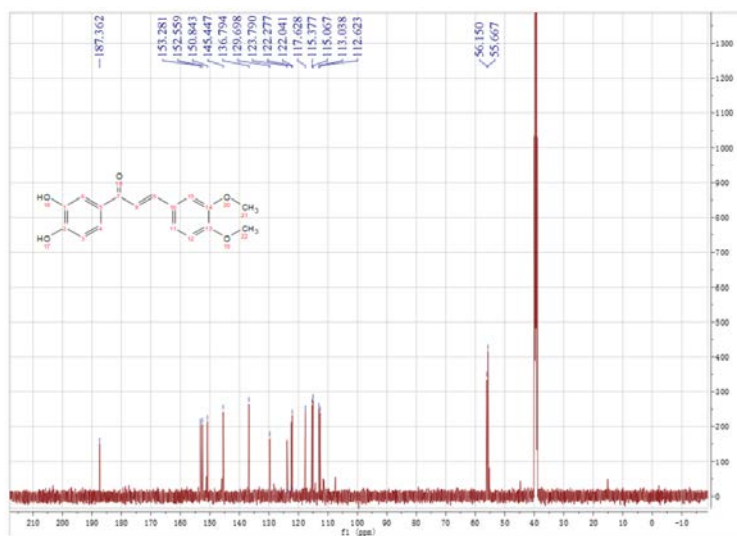

Figure S43 LC-MS, <sup>1</sup>H NMR and <sup>13</sup>C NMR spectra of compound **41**.
